# Supplementary material for: Behavioral and brain-wide neural signatures of sundowning in Alzheimer’s disease
Source: Research Square preprint supplement (doi:10.21203/rs.3.rs-9272255/v1), 2026-04-20
Supplement: Supplementary file 1 [file 1aad8279f9641143ebcc80d0.pdf]

Supplementary Table 3 | Main and interaction effects of cognitive state, time of scan, and gender across networks.

| Predictor                                       | SN       |               |              | DMN      |               |              | FPN      |              |         | SMN (hand) |               |              | SMN (mouth) |               |             | DAN      |              |              |
|-------------------------------------------------|----------|---------------|--------------|----------|---------------|--------------|----------|--------------|---------|------------|---------------|--------------|-------------|---------------|-------------|----------|--------------|--------------|
|                                                 | Estimate | CI            | p value      | Estimate | CI            | p value      | Estimate | CI           | p value | Estimate   | CI            | p value      | Estimate    | CI            | p value     | Estimate | CI           | p value      |
| Intercept                                       | 0.3      | 0.23 – 0.37   | <0.001       | 0.32     | 0.27 – 0.37   | <0.001       | 0.28     | 0.22 – 0.35  | <0.001  | 0.49       | 0.40 – 0.59   | <0.001       | 0.85        | 0.74 – 0.96   | <0.001      | 0.16     | 0.10 – 0.22  | <0.001       |
| MCI diagnosis                                   | 0        | -0.07 – 0.06  | 0.916        | 0.01     | -0.04 – 0.06  | 0.641        | 0.03     | -0.03 – 0.09 | 0.328   | -0.01      | -0.11 – 0.09  | 0.852        | -0.07       | -0.18 – 0.04  | 0.195       | -0.02    | -0.08 – 0.04 | 0.55         |
| AD diagnosis                                    | -0.06    | -0.17 – 0.04  | 0.213        | 0        | -0.08 – 0.08  | 0.99         | -0.04    | -0.14 – 0.05 | 0.396   | -0.05      | -0.19 – 0.10  | 0.519        | -0.11       | -0.27 – 0.05  | 0.188       | 0        | -0.09 – 0.08 | 0.964        |
| Time of scan                                    | 0        | -0.01 – -0.00 | <b>0.014</b> | 0        | -0.01 – -0.00 | <b>0.027</b> | 0        | -0.00 – 0.00 | 0.377   | 0          | -0.01 – 0.00  | 0.317        | 0           | -0.01 – 0.00  | 0.113       | 0        | -0.00 – 0.00 | 0.931        |
| Gender (male)                                   | 0.01     | -0.06 – 0.07  | 0.793        | -0.04    | -0.09 – 0.01  | 0.096        | 0.03     | -0.03 – 0.09 | 0.369   | 0.02       | -0.07 – 0.11  | 0.697        | -0.02       | -0.12 – 0.09  | 0.737       | 0.03     | -0.03 – 0.08 | 0.294        |
| Mean framewise displacement                     | 0.17     | 0.11 – 0.22   | <0.001       | -0.03    | -0.08 – 0.01  | 0.091        | 0.11     | 0.05 – 0.16  | <0.001  | 0.14       | 0.06 – 0.22   | <0.001       | -0.17       | -0.26 – -0.08 | <0.001      | 0.08     | 0.04 – 0.13  | <b>0.001</b> |
| Age                                             | 0        | -0.00 – 0.00  | 0.08         | 0        | -0.00 – -0.00 | <b>0.001</b> | 0        | -0.00 – 0.00 | 0.153   | 0          | -0.00 – -0.00 | <b>0.005</b> | 0           | -0.01 – -0.00 | <0.001      | 0        | -0.00 – 0.00 | 0.657        |
| Positive history of sedative or hypnotics usage | -0.02    | -0.05 – 0.01  | 0.262        | 0        | -0.02 – 0.02  | 0.979        | -0.01    | -0.04 – 0.02 | 0.485   | -0.01      | -0.05 – 0.03  | 0.582        | -0.01       | -0.06 – 0.04  | 0.784       | -0.01    | -0.04 – 0.01 | 0.375        |
| Positive history of hypertension                | 0        | -0.01 – 0.01  | 0.829        | 0        | -0.01 – 0.01  | 0.845        | 0        | -0.01 – 0.01 | 0.742   | 0          | -0.02 – 0.01  | 0.703        | -0.02       | -0.04 – -0.00 | <b>0.04</b> | 0.01     | 0.00 – 0.02  | <b>0.018</b> |
| MCI diagnosis X Time of scan                    | 0        | -0.01 – 0.00  | 0.785        | 0        | -0.01 – 0.00  | 0.561        | 0        | -0.01 – 0.00 | 0.248   | 0          | -0.01 – 0.01  | 0.838        | 0           | -0.01 – 0.01  | 0.592       | 0        | -0.00 – 0.01 | 0.817        |
| AD diagnosis X Time of scan                     | 0        | -0.00 – 0.01  | 0.305        | 0        | -0.01 – 0.01  | 0.97         | 0        | -0.00 – 0.01 | 0.372   | 0          | -0.01 – 0.01  | 0.869        | 0           | -0.01 – 0.02  | 0.492       | 0        | -0.01 – 0.01 | 0.958        |
| MCI diagnosis X Gender                          | -0.01    | -0.10 – 0.09  | 0.902        | 0.01     | -0.06 – 0.08  | 0.821        | -0.04    | -0.13 – 0.05 | 0.361   | -0.05      | -0.19 – 0.08  | 0.434        | 0.04        | -0.11 – 0.20  | 0.586       | 0.03     | -0.05 – 0.11 | 0.478        |
| AD diagnosis X Gender                           | -0.06    | -0.20 – 0.08  | 0.419        | -0.02    | -0.13 – 0.08  | 0.686        | -0.02    | -0.15 – 0.12 | 0.79    | 0.03       | -0.17 – 0.23  | 0.775        | 0.1         | -0.13 – 0.33  | 0.395       | -0.04    | -0.16 – 0.08 | 0.514        |
| Time of scan X Gender                           | 0        | -0.00 – 0.01  | 0.536        | 0        | 0.00 – 0.01   | <b>0.015</b> | 0        | -0.01 – 0.00 | 0.934   | 0          | -0.01 – 0.01  | 0.678        | 0           | -0.00 – 0.01  | 0.406       | 0        | -0.01 – 0.00 | 0.433        |
| MCI diagnosis X Time of scan X Gender           | 0        | -0.01 – 0.01  | 0.92         | 0        | -0.01 – 0.00  | 0.66         | 0        | -0.00 – 0.01 | 0.349   | 0          | -0.01 – 0.02  | 0.446        | 0           | -0.01 – 0.01  | 0.8         | 0        | -0.01 – 0.00 | 0.485        |
| AD diagnosis X Time of scan X Gender            | 0        | -0.01 – 0.02  | 0.442        | 0        | -0.01 – 0.01  | 0.808        | 0        | -0.01 – 0.01 | 0.809   | 0          | -0.02 – 0.01  | 0.822        | -0.01       | -0.02 – 0.01  | 0.584       | 0        | -0.01 – 0.01 | 0.551        |
