# Supplementary material for: Behavioral and brain-wide neural signatures of sundowning in Alzheimer’s disease
Source: Research Square preprint supplement (doi:10.21203/rs.3.rs-9272255/v1), 2026-04-20
Supplement: Supplementary file 2 [file 616c899956c5030273d9ec6f.pdf]

**Extended Data Table 1 | Subject demographics.**

|                                    | <b>Cognitive group</b> |                 |
|------------------------------------|------------------------|-----------------|
|                                    | CN (N=397)             | MCI (N=248)     |
| <b>Age</b>                         |                        |                 |
| Mean (SD)                          | 73.682 (7.367)         | 74.384 (8.105)  |
| Range                              | 56.000 - 95.400        | 56.500 - 93.200 |
| <b>Subject gender</b>              |                        |                 |
| Female                             | 233 (58.7%)            | 104 (41.9%)     |
| Male                               | 164 (41.3%)            | 144 (58.1%)     |
| <b>Mean framewise displacement</b> |                        |                 |
| Mean (SD)                          | 0.181 (0.090)          | 0.190 (0.092)   |
| Range                              | 0.042 - 0.646          | 0.043 - 0.578   |
| <b>Scan Time</b>                   |                        |                 |
| Mean (SD)                          | 12.189 (2.588)         | 12.556 (2.684)  |
| Range                              | 7.000 - 19.000         | 7.000 - 22.000  |
| <b>History of hypertension</b>     |                        |                 |
| No                                 | 243 (61.2%)            | 133 (53.6%)     |
| Yes                                | 154 (38.8%)            | 115 (46.4%)     |
| <b>Sedative or hypnotic usage</b>  |                        |                 |
| No                                 | 389 (98.0%)            | 240 (96.8%)     |
| Yes                                | 8 (2.0%)               | 8 (3.2%)        |
| <b>Sleep disturbances</b>          |                        |                 |
| No                                 | 332 (83.6%)            | 191 (77.0%)     |
| Yes                                | 65 (16.4%)             | 57 (23.0%)      |

|                 | <b>All subjects</b> | <b>p value</b>    |
|-----------------|---------------------|-------------------|
| AD (N=91)       | Total (N=736)       |                   |
|                 |                     | <b>0.044</b>      |
| 75.895 (8.255)  | 74.192 (7.757)      |                   |
| 56.000 - 96.000 | 56.000 - 96.000     |                   |
|                 |                     | <b>&lt; 0.001</b> |
| 43 (47.3%)      | 380 (51.6%)         |                   |
| 48 (52.7%)      | 356 (48.4%)         |                   |
|                 |                     | <b>0.003</b>      |
| 0.217 (0.091)   | 0.188 (0.091)       |                   |
| 0.062 - 0.483   | 0.042 - 0.646       |                   |
|                 |                     | 0.213             |
| 12.385 (2.342)  | 12.337 (2.594)      |                   |
| 7.000 - 17.000  | 7.000 - 22.000      |                   |
|                 |                     | 0.063             |
| 46 (50.5%)      | 422 (57.3%)         |                   |
| 45 (49.5%)      | 314 (42.7%)         |                   |
|                 |                     | 0.066             |
| 85 (93.4%)      | 714 (97.0%)         |                   |
| 6 (6.6%)        | 22 (3.0%)           |                   |
|                 |                     | 0.060             |
| 69 (75.8%)      | 592 (80.4%)         |                   |
| 22 (24.2%)      | 144 (19.6%)         |                   |
