# Supplementary material for: Behavioral and brain-wide neural signatures of sundowning in Alzheimer’s disease
Source: Research Square preprint supplement (doi:10.21203/rs.3.rs-9272255/v1), 2026-04-20
Supplement: Supplementary file 3 [file 767c956c9ea954fe7d6ef5a0.pdf]

| <b>Supplementary Table 2   Table of abbreviations</b> |                                             |
|-------------------------------------------------------|---------------------------------------------|
| <b>Acronym</b>                                        | <b>Expansion</b>                            |
| ACA                                                   | anterior cingulate cortex/area              |
| AD                                                    | Alzheimer's disease                         |
| ADNI                                                  | Alzheimer's Disease Neuroimaging Initiative |
| APOE                                                  | apolipoprotein E                            |
| APP                                                   | amyloid precursor protein                   |
| AR-HMM                                                | autoregressive hidden Markov model          |
| AUC                                                   | area under the curve                        |
| AVP                                                   | vasopressin / arginine vasopressin          |
| A $\beta$                                             | amyloid beta                                |
| CA3 / vCA3                                            | cornu ammonis 3 / ventral CA3               |
| CI                                                    | confidence interval                         |
| CN                                                    | cognitively normal                          |
| CNU                                                   | cerebral nuclei                             |
| CSF                                                   | cerebrospinal fluid                         |
| Ctrl                                                  | control                                     |
| CTXsp                                                 | cortical subplate                           |
| DAN                                                   | dorsal attention network                    |
| DMN                                                   | default mode network                        |
| DMSO                                                  | dimethylsulfoxide                           |
| EEG                                                   | electroencephalography                      |
| EMG                                                   | electromyography                            |
| EPM                                                   | elevated plus maze                          |
| FFT                                                   | fast Fourier transform                      |
| FOV                                                   | field of view                               |
| FPN                                                   | frontoparietal network                      |
| FWD                                                   | framewise displacement                      |
| HB                                                    | hindbrain                                   |
| HPF                                                   | hippocampal formation                       |
| HY                                                    | hypothalamus                                |
| IEG                                                   | immediate early gene                        |
| LMEM                                                  | linear mixed-effects model                  |
| LV                                                    | latent variable                             |
| MB                                                    | midbrain                                    |
| MCI                                                   | mild cognitive impairment                   |
| MMSE                                                  | mini-mental status examination              |
| NREM                                                  | non-rapid eye movement sleep                |
| OF                                                    | open field                                  |
| OLF                                                   | olfactory areas                             |
| PL                                                    | prelimbic cortex                            |
| PLSC                                                  | partial least squares correlation           |
| PS1                                                   | presenilin 1                                |
| REM                                                   | rapid eye movement sleep                    |
| rsFC                                                  | resting-state functional connectivity       |
| SBPV                                                  | subparaventricular zone                     |
| SCN                                                   | suprachiasmatic nucleus                     |
| SN                                                    | Saliency Network                            |
| SVD                                                   | singular value decomposition                |
| SWA                                                   | slow-wave activity                          |
| TH                                                    | thalamus                                    |
| Veh                                                   | vehicle                                     |
| VIP                                                   | vasoactive intestinal peptide               |
| vVMH                                                  | ventrolateral ventromedial hypothalamus     |
| ZT                                                    | zeitgeber time                              |
