# Supplementary material for: Behavioral and brain-wide neural signatures of sundowning in Alzheimer’s disease
Source: Research Square preprint supplement (doi:10.21203/rs.3.rs-9272255/v1), 2026-04-20
Supplement: Supplementary file 4 [file bf82b11fb4c86aacb4925fc2.pdf]

Supplementary Table S1 | Main, extended data, and supplementary data figures statistics

| Experiment                                                                                    | Measure                            | Statistical Test                                                                              | Comparison          | Statistic (F or t or q or U) | ° of freedom | p       | *    | Fig. |    |
|-----------------------------------------------------------------------------------------------|------------------------------------|-----------------------------------------------------------------------------------------------|---------------------|------------------------------|--------------|---------|------|------|----|
| EEG/EMG recordings                                                                            | Total time per day in Wake         | Unpaired t-test, two-tailed                                                                   | 2:Ctrl vs. 2:AD     | 2.185                        | 15           | 0.0452  | *    | 1e   |    |
|                                                                                               | Total time per day in NREM         |                                                                                               |                     | 2.197                        | 15           | 0.0441  | *    |      |    |
|                                                                                               | Total time per day in REM          |                                                                                               |                     | 0.446                        | 15           | 0.6622  | -    |      |    |
|                                                                                               | Mean bout duration per day in Wake |                                                                                               |                     | 0.518                        | 15           | 0.6119  | -    |      |    |
|                                                                                               | Mean bout duration per day in NREM |                                                                                               |                     | 3.040                        | 15           | 0.0083  | **   |      |    |
|                                                                                               | Mean bout duration per day in REM  |                                                                                               |                     | 2.393                        | 15           | 0.0303  | *    |      |    |
|                                                                                               | Total time per day in Wake         |                                                                                               | 12:Ctrl vs. 12:AD   | 1.624                        | 14           | 0.1267  | -    | 1g   |    |
|                                                                                               | Total time per day in NREM         |                                                                                               |                     | 3.414                        | 14           | 0.0042  | **   |      |    |
|                                                                                               | Total time per day in REM          |                                                                                               |                     | 1.204                        | 14           | 0.2487  | -    |      |    |
|                                                                                               | Mean bout duration per day in Wake |                                                                                               |                     | 1.738                        | 14           | 0.1041  | -    |      |    |
|                                                                                               | Mean bout duration per day in NREM |                                                                                               |                     | 1.487                        | 14           | 0.1592  | -    |      |    |
|                                                                                               | Mean bout duration per day in REM  |                                                                                               |                     | 0.118                        | 14           | 0.9081  | -    |      |    |
|                                                                                               | Delta power (AUC) during NREM      |                                                                                               | 2:Ctrl vs. 2:AD     | 0.047                        | 15           | 0.9628  | -    | 1j   |    |
|                                                                                               | -                                  |                                                                                               | 12:Ctrl vs. 12:AD   | 3.665                        | 14           | 0.0025  | **   | 1l   |    |
| -                                                                                             | Simple linear regression           | Hippocampal plaque burden vs. Average NREM time per day                                       | 9.220               | 1, 6                         | 0.0229       | *       | 1o   |      |    |
| -                                                                                             |                                    | Cortical plaque burden vs. Average NREM time per day                                          | 4.972               | 1, 6                         | 0.0673       | -       | 1p   |      |    |
| EPM: Sundown (males)                                                                          | Total open arm time                | Two-way ANOVA                                                                                 | Age                 | 49.300                       | 2, 88        | <0.0001 | **** | 2d   |    |
|                                                                                               |                                    |                                                                                               | Genotype            | 9.775                        | 1, 88        | 0.0024  | **   |      |    |
|                                                                                               |                                    |                                                                                               | Age x Genotype      | 3.859                        | 2, 88        | 0.0247  | *    |      |    |
|                                                                                               |                                    | Tukey's multiple comparisons tests                                                            | 2:Ctrl vs. 2:AD     | 0.368                        | 88           | 0.9998  | -    |      |    |
|                                                                                               |                                    |                                                                                               | 2:Ctrl vs. 12:Ctrl  | 3.029                        | 88           | 0.2759  | -    |      |    |
|                                                                                               |                                    |                                                                                               | 2:Ctrl vs. 12:AD    | 4.344                        | 88           | 0.0327  | *    |      |    |
|                                                                                               |                                    |                                                                                               | 2:Ctrl vs. 24:Ctrl  | 6.750                        | 88           | 0.0001  | ***  |      |    |
|                                                                                               |                                    |                                                                                               | 2:Ctrl vs. 24:AD    | 13.770                       | 88           | <0.0001 | **** |      |    |
|                                                                                               |                                    |                                                                                               | 2:AD vs. 12:Ctrl    | 2.642                        | 88           | 0.4286  | -    |      |    |
|                                                                                               |                                    |                                                                                               | 2:AD vs. 12:AD      | 3.977                        | 88           | 0.0649  | -    |      |    |
|                                                                                               |                                    |                                                                                               | 2:AD vs. 24:Ctrl    | 6.428                        | 88           | 0.0002  | ***  |      |    |
|                                                                                               |                                    |                                                                                               | 2:AD vs. 24:AD      | 13.400                       | 88           | <0.0001 | **** |      |    |
|                                                                                               |                                    |                                                                                               | 12:Ctrl vs. 12:AD   | 1.550                        | 88           | 0.8816  | -    |      |    |
|                                                                                               |                                    |                                                                                               | 12:Ctrl vs. 24:Ctrl | 4.403                        | 88           | 0.0291  | *    |      |    |
|                                                                                               |                                    |                                                                                               | 12:Ctrl vs. 24:AD   | 11.480                       | 88           | <0.0001 | **** |      |    |
|                                                                                               |                                    |                                                                                               | 12:AD vs. 24:Ctrl   | 2.940                        | 88           | 0.3078  | -    |      |    |
| 12:AD vs. 24:AD                                                                               | 9.423                              | 88                                                                                            | <0.0001             | ****                         |              |         |      |      |    |
| 24:Ctrl vs. 24:AD                                                                             | 5.325                              | 88                                                                                            | 0.0040              | **                           |              |         |      |      |    |
| EPM: Sundown (females)                                                                        |                                    | Two-way ANOVA                                                                                 | Age                 | 22.550                       | 2, 70        | <0.0001 | **** | 2e   |    |
|                                                                                               |                                    |                                                                                               | Genotype            | 14.920                       | 1, 70        | 0.0002  | ***  |      |    |
|                                                                                               |                                    |                                                                                               | Age x Genotype      | 5.487                        | 2, 70        | 0.0061  | **   |      |    |
|                                                                                               |                                    | Tukey's multiple comparisons tests                                                            | 2:Ctrl vs. 2:AD     | 0.291                        | 70           | 0.8379  | -    |      |    |
|                                                                                               |                                    |                                                                                               | 12:Ctrl vs. 12:AD   | 3.471                        | 70           | 0.0166  | *    |      |    |
|                                                                                               |                                    |                                                                                               | 24:Ctrl vs. 24:AD   | 5.780                        | 70           | 0.0001  | ***  |      |    |
|                                                                                               |                                    |                                                                                               | 2:Ctrl vs. 12:Ctrl  | 1.081                        | 70           | 0.7260  | -    |      |    |
|                                                                                               |                                    |                                                                                               | 2:Ctrl vs. 24:Ctrl  | 3.442                        | 70           | 0.0455  | -    |      |    |
|                                                                                               |                                    |                                                                                               | 12:Ctrl vs. 24:Ctrl | 2.621                        | 70           | 0.1600  | -    |      |    |
|                                                                                               |                                    |                                                                                               | 2:AD vs. 12:AD      | 4.556                        | 70           | 0.0054  | **   |      |    |
| 2:AD vs. 24:AD                                                                                | 9.933                              | 70                                                                                            | <0.0001             | ****                         |              |         |      |      |    |
| 12:AD vs. 24:AD                                                                               | 5.974                              | 70                                                                                            | 0.0002              | ***                          |              |         |      |      |    |
| OF: Sundown (males)                                                                           | Distance traveled                  | Two-way ANOVA                                                                                 | Age                 | 2.095                        | 2, 49        | 0.1340  | -    | 2h   |    |
|                                                                                               |                                    |                                                                                               | Genotype            | 21.270                       | 1, 49        | <0.0001 | **** |      |    |
|                                                                                               |                                    |                                                                                               | Age x Genotype      | 1.860                        | 2, 49        | 0.1665  | -    |      |    |
|                                                                                               |                                    | Tukey's multiple comparisons tests (conducted based on trends observed and a priori interest) | 2:Ctrl vs. 2:AD     | 1.796                        | 49           | 0.2101  | -    |      |    |
|                                                                                               |                                    |                                                                                               | 12:Ctrl vs. 12:AD   | 3.805                        | 49           | 0.0097  | **   |      |    |
|                                                                                               |                                    |                                                                                               | 24:Ctrl vs. 24:AD   | 6.334                        | 49           | <0.0001 | **** |      |    |
|                                                                                               |                                    |                                                                                               | 2:Ctrl vs. 12:Ctrl  | 1.544                        | 49           | 0.5235  | -    |      |    |
|                                                                                               | 2:Ctrl vs. 24:Ctrl                 | 1.023                                                                                         | 49                  | 0.7509                       | -            |         |      |      |    |
|                                                                                               | 12:Ctrl vs. 24:Ctrl                | 0.626                                                                                         | 49                  | 0.8978                       | -            |         |      |      |    |
|                                                                                               | 2:AD vs. 12:AD                     | 0.385                                                                                         | 49                  | 0.9600                       | -            |         |      |      |    |
|                                                                                               | 2:AD vs. 24:AD                     | 2.486                                                                                         | 49                  | 0.1946                       | -            |         |      |      |    |
|                                                                                               | 12:AD vs. 24:AD                    | 3.249                                                                                         | 49                  | 0.0655                       | -            |         |      |      |    |
|                                                                                               | Rearing No.                        | Two-way ANOVA                                                                                 | Age                 | 4.571                        | 2, 39        | 0.0165  | *    |      | 2i |
|                                                                                               |                                    |                                                                                               | Genotype            | 3.428                        | 1, 39        | 0.0717  | -    |      |    |
| Age x Genotype                                                                                |                                    |                                                                                               | 2.179               | 2, 39                        | 0.1267       | -       |      |      |    |
| Tukey's multiple comparisons tests (conducted based on trends observed and a priori interest) |                                    | 2:Ctrl vs. 2:AD                                                                               | 0.494               | 39                           | 0.7288       | -       |      |      |    |
|                                                                                               |                                    | 12:Ctrl vs. 12:AD                                                                             | 1.484               | 39                           | 0.3006       | -       |      |      |    |
|                                                                                               |                                    | 24:Ctrl vs. 24:AD                                                                             | 4.112               | 39                           | 0.0060       | **      |      |      |    |
|                                                                                               |                                    | 2:Ctrl vs. 12:Ctrl                                                                            | 0.029               | 39                           | 0.9998       | -       |      |      |    |
| 2:Ctrl vs. 24:Ctrl                                                                            | 0.887                              | 39                                                                                            | 0.8062              | -                            |              |         |      |      |    |
| 12:Ctrl vs. 24:Ctrl                                                                           | 0.937                              | 39                                                                                            | 0.7864              | -                            |              |         |      |      |    |
| 2:AD vs. 12:AD                                                                                | 1.894                              | 39                                                                                            | 0.3826              | -                            |              |         |      |      |    |
| 2:AD vs. 24:AD                                                                                | 4.824                              | 39                                                                                            | 0.0042              | **                           |              |         |      |      |    |
| 12:AD vs. 24:AD                                                                               | 2.559                              | 39                                                                                            | 0.1799              | -                            |              |         |      |      |    |
| OF: Sundown (females)                                                                         | Distance traveled                  | Two-way ANOVA                                                                                 | Age                 | 7.067                        | 2, 59        | 0.0018  | **   | 2j   |    |
|                                                                                               |                                    |                                                                                               | Genotype            | 7.535                        | 1, 59        | 0.0080  | **   |      |    |
|                                                                                               |                                    |                                                                                               | Age x Genotype      | 7.666                        | 2, 59        | 0.0011  | **   |      |    |
|                                                                                               |                                    | Tukey's multiple comparisons tests                                                            | 2:Ctrl vs. 2:AD     | 0.372                        | 59           | 0.9998  | -    |      |    |
|                                                                                               |                                    |                                                                                               | 2:Ctrl vs. 12:Ctrl  | 1.984                        | 59           | 0.7253  | -    |      |    |
|                                                                                               |                                    |                                                                                               | 2:Ctrl vs. 12:AD    | 1.791                        | 59           | 0.8018  | -    |      |    |
|                                                                                               |                                    |                                                                                               | 2:Ctrl vs. 24:Ctrl  | 0.944                        | 59           | 0.9848  | -    |      |    |
|                                                                                               |                                    |                                                                                               | 2:Ctrl vs. 24:AD    | 6.177                        | 59           | 0.0007  | ***  |      |    |
|                                                                                               |                                    |                                                                                               | 2:AD vs. 12:Ctrl    | 1.763                        | 59           | 0.8120  | -    |      |    |
|                                                                                               |                                    |                                                                                               | 2:AD vs. 12:AD      | 1.546                        | 59           | 0.8821  | -    |      |    |
|                                                                                               |                                    |                                                                                               | 2:AD vs. 24:Ctrl    | 0.596                        | 59           | 0.9982  | -    |      |    |
|                                                                                               |                                    |                                                                                               | 2:AD vs. 24:AD      | 6.384                        | 59           | 0.0004  | ***  |      |    |
|                                                                                               |                                    |                                                                                               | 12:Ctrl vs. 12:AD   | 0.152                        | 59           | >0.9999 | -    |      |    |
|                                                                                               | 12:Ctrl vs. 24:Ctrl                | 1.390                                                                                         | 59                  | 0.9217                       | -            |         |      |      |    |
|                                                                                               | 12:Ctrl vs. 24:AD                  | 5.990                                                                                         | 59                  | 0.0011                       | **           |         |      |      |    |
|                                                                                               | 12:AD vs. 24:Ctrl                  | 1.136                                                                                         | 59                  | 0.9658                       | -            |         |      |      |    |
|                                                                                               | 12:AD vs. 24:AD                    | 5.740                                                                                         | 59                  | 0.0020                       | **           |         |      |      |    |
|                                                                                               | 24:Ctrl vs. 24:AD                  | 6.731                                                                                         | 59                  | 0.0002                       | ***          |         |      |      |    |
|                                                                                               | Two-way ANOVA                      | Age                                                                                           | 15.280              | 2, 49                        | <0.0001      | ****    |      |      |    |
|                                                                                               |                                    | Genotype                                                                                      | 1.716               | 1, 49                        | 0.1964       | -       |      |      |    |
| Age x Genotype                                                                                |                                    | 4.451                                                                                         | 2, 49               | 0.0167                       | *            |         |      |      |    |
| 2:Ctrl vs. 2:AD                                                                               |                                    | 0.122                                                                                         | 49                  | >0.9999                      | -            |         |      |      |    |
| 2:Ctrl vs. 12:Ctrl                                                                            |                                    | 0.915                                                                                         | 49                  | 0.9867                       | -            |         |      |      |    |
| 2:Ctrl vs. 12:AD                                                                              |                                    | 0.100                                                                                         | 49                  | >0.9999                      | -            |         |      |      |    |
| 2:Ctrl vs. 24:Ctrl                                                                            |                                    | 2.526                                                                                         | 49                  | 0.4839                       | -            |         |      |      |    |

|                                                |                               |                                                                                               |                               |         |       |         |      |    |
|------------------------------------------------|-------------------------------|-----------------------------------------------------------------------------------------------|-------------------------------|---------|-------|---------|------|----|
|                                                | Rearing No.                   | Tukey's multiple comparisons tests                                                            | 2:Ctrl vs. 24:AD              | 5.985   | 49    | 0.0013  | **   | 2k |
|                                                |                               |                                                                                               | 2:AD vs. 12:Ctrl              | 1.180   | 49    | 0.9596  | -    |    |
|                                                |                               |                                                                                               | 2:AD vs. 12:AD                | 0.252   | 49    | >0.9999 | -    |    |
|                                                |                               |                                                                                               | 2:AD vs. 24:Ctrl              | 2.988   | 49    | 0.2979  | -    |    |
|                                                |                               |                                                                                               | 2:AD vs. 24:AD                | 6.731   | 49    | 0.0002  | ***  |    |
|                                                |                               |                                                                                               | 12:Ctrl vs. 12:AD             | 0.982   | 49    | 0.9817  | -    |    |
|                                                |                               |                                                                                               | 12:Ctrl vs. 24:Ctrl           | 2.161   | 49    | 0.6482  | -    |    |
|                                                |                               |                                                                                               | 12:Ctrl vs. 24:AD             | 6.522   | 49    | 0.0004  | ***  |    |
|                                                |                               |                                                                                               | 12:AD vs. 24:Ctrl             | 2.937   | 49    | 0.3161  | -    |    |
|                                                |                               |                                                                                               | 12:AD vs. 24:AD               | 6.908   | 49    | 0.0002  | ***  |    |
| EPM: Sunrise (males)                           | Total open arm time           | Two-way ANOVA                                                                                 | 24:Ctrl vs. 24:AD             | 4.635   | 49    | 0.0224  | *    | 2n |
|                                                |                               |                                                                                               | Age                           | 5.484   | 2, 56 | 0.0067  | **   |    |
| EPM: Sunrise (females)                         | Total open arm time           | Two-way ANOVA                                                                                 | Genotype                      | 1.203   | 1, 56 | 0.2773  | -    | 2o |
|                                                |                               |                                                                                               | Age x Genotype                | 0.731   | 2, 56 | 0.4858  | -    |    |
| OF: Sunrise (males)                            | Distance traveled             | Two-way ANOVA                                                                                 | Age                           | 1.360   | 2, 26 | 0.7128  | -    | 2r |
|                                                |                               |                                                                                               | Genotype                      | 0.343   | 1, 26 | 0.7468  | -    |    |
| OF: Sunrise (females)                          | Distance traveled             | Two-way ANOVA                                                                                 | Age x Genotype                | 0.107   | 2, 26 | 0.2743  | -    | 2s |
|                                                |                               |                                                                                               | Age                           | 1.046   | 2, 37 | 0.3614  | -    |    |
| OF: Sunrise (males)                            | Rearing No.                   | Two-way ANOVA                                                                                 | Genotype                      | 0.237   | 1, 37 | 0.6293  | -    | 2t |
|                                                |                               |                                                                                               | Age x Genotype                | 2.565   | 2, 37 | 0.0905  | -    |    |
| OF: Sunrise (females)                          | Rearing No.                   | Two-way ANOVA                                                                                 | Age                           | 5.245   | 2, 38 | 0.0097  | **   | 2u |
|                                                |                               |                                                                                               | Genotype                      | 0.755   | 1, 38 | 0.3905  | -    |    |
| EPM: Sunrise or Sundown (12-month-old females) | Total open arm time           | Two-way ANOVA                                                                                 | Age x Genotype                | 2.012   | 2, 38 | 0.1477  | -    | 3b |
|                                                |                               |                                                                                               | Age                           | 2.616   | 2, 47 | 0.0837  | -    |    |
| EPM: Sunrise or Sundown (12-month-old females) | Total open arm time           | Šidák's multiple comparisons tests (conducted based on trends observed and a priori interest) | Genotype                      | 0.865   | 1, 47 | 0.3570  | -    | 3c |
|                                                |                               |                                                                                               | Age x Genotype                | 0.907   | 2, 47 | 0.4106  | -    |    |
| OF: Sunrise or Sundown (12-month-old females)  | Distance traveled             | Two-way ANOVA                                                                                 | Age                           | 0.065   | 2, 47 | 0.9374  | -    | 3d |
|                                                |                               |                                                                                               | Genotype                      | 0.366   | 1, 47 | 0.5480  | -    |    |
| OF: Sunrise or Sundown (12-month-old females)  | Distance traveled             | Šidák's multiple comparisons tests                                                            | Age x Genotype                | 0.937   | 2, 47 | 0.3990  | -    | 3e |
|                                                |                               |                                                                                               | Period                        | 8.961   | 1, 91 | 0.0036  | **   |    |
| OF: Sunrise or Sundown (12-month-old females)  | Distance traveled             | Two-way ANOVA                                                                                 | Genotype                      | 19.020  | 1, 91 | <0.0001 | **** | 3f |
|                                                |                               |                                                                                               | Period x Genotype             | 1.738   | 1, 91 | 0.1907  | -    |    |
| OF: Sunrise or Sundown (12-month-old females)  | Distance traveled             | Šidák's multiple comparisons tests                                                            | Sunrise:Ctrl vs. Sunrise:AD   | 2.080   | 91    | 0.1518  | -    | 3g |
|                                                |                               |                                                                                               | Sundown:Ctrl vs. Sundown:AD   | 4.164   | 91    | 0.0003  | ***  |    |
| OF: Sunrise or Sundown (12-month-old females)  | Distance traveled             | Šidák's multiple comparisons tests                                                            | Sunrise:AD vs. Sundown:AD     | 3.017   | 91    | 0.0132  | *    | 3h |
|                                                |                               |                                                                                               | Sunrise:Ctrl vs. Sundown:Ctrl | 1.197   | 91    | 0.6562  | -    |    |
| OF: Sunrise or Sundown (12-month-old females)  | Distance traveled             | Two-way ANOVA                                                                                 | Period                        | 2.064   | 1, 39 | 0.1588  | -    | 3i |
|                                                |                               |                                                                                               | Genotype                      | 5.204   | 1, 39 | 0.0281  | *    |    |
| OF: Sunrise or Sundown (12-month-old females)  | Distance traveled             | Šidák's multiple comparisons tests                                                            | Period x Genotype             | 4.317   | 1, 39 | 0.0444  | *    | 3j |
|                                                |                               |                                                                                               | Sunrise:Ctrl vs. Sunrise:AD   | 3.014   | 39    | 0.0179  | *    |    |
| OF: Sunrise or Sundown (12-month-old females)  | Distance traveled             | Šidák's multiple comparisons tests                                                            | Sundown:Ctrl vs. Sundown:AD   | 0.147   | 39    | 0.9998  | -    | 3k |
|                                                |                               |                                                                                               | Sunrise:AD vs. Sundown:AD     | 0.431   | 39    | 0.9879  | -    |    |
| OF: Sunrise or Sundown (12-month-old females)  | Distance traveled             | Šidák's multiple comparisons tests                                                            | Sunrise:Ctrl vs. Sundown:Ctrl | 2.625   | 39    | 0.0483  | *    | 3l |
|                                                |                               |                                                                                               | Syllable                      | 8.808   | 18    | 0.0000  | **** |    |
| OF: Sunrise or Sundown (12-month-old females)  | Distance traveled             | Three-way ANOVA                                                                               | Genotype                      | 9.092   | 1     | 0.0026  | **   | 3m |
|                                                |                               |                                                                                               | Period                        | 12.174  | 1     | 0.0005  | ***  |    |
| OF: Sunrise or Sundown (12-month-old females)  | Distance traveled             | Three-way ANOVA                                                                               | Syllable x Genotype           | 4.245   | 18    | 0.0000  | **** | 3n |
|                                                |                               |                                                                                               | Syllable x Period             | 5.980   | 18    | 0.0000  | **** |    |
| OF: Sunrise or Sundown (12-month-old females)  | Distance traveled             | Three-way ANOVA                                                                               | Genotype X Period             | 5.592   | 1     | 0.0183  | *    | 3o |
|                                                |                               |                                                                                               | Syllable x Genotype x Period  | 2.846   | 18    | 0.0001  | **** |    |
| KPMS EPM analysis                              | Normalized syllable frequency | Mann-Whitney U test with FDR correction                                                       | AD Sunrise vs. AD Sundown     | 77.000  | 20    | 0.2789  | -    | 3p |
|                                                |                               |                                                                                               | AD Sunrise vs. AD Sundown     | 49.000  | 20    | 0.5865  | -    |    |
| KPMS EPM analysis                              | Normalized syllable frequency | Mann-Whitney U test with FDR correction                                                       | AD Sunrise vs. AD Sundown     | 84.000  | 20    | 0.1397  | -    | 3q |
|                                                |                               |                                                                                               | AD Sunrise vs. AD Sundown     | 83.000  | 20    | 0.1495  | -    |    |
| KPMS EPM analysis                              | Normalized syllable frequency | Mann-Whitney U test with FDR correction                                                       | AD Sunrise vs. AD Sundown     | 84.000  | 20    | 0.1397  | -    | 3r |
|                                                |                               |                                                                                               | AD Sunrise vs. AD Sundown     | 78.000  | 20    | 0.2651  | -    |    |
| KPMS EPM analysis                              | Normalized syllable frequency | Mann-Whitney U test with FDR correction                                                       | AD Sunrise vs. AD Sundown     | 57.000  | 20    | 0.9479  | -    | 3s |
|                                                |                               |                                                                                               | AD Sunrise vs. AD Sundown     | 15.000  | 20    | 0.0103  | *    |    |
| KPMS EPM analysis                              | Normalized syllable frequency | Mann-Whitney U test with FDR correction                                                       | AD Sunrise vs. AD Sundown     | 13.000  | 20    | 0.0091  | **   | 3t |
|                                                |                               |                                                                                               | AD Sunrise vs. AD Sundown     | 19.000  | 19    | 0.0275  | *    |    |
| KPMS EPM analysis                              | Normalized syllable frequency | Mann-Whitney U test with FDR correction                                                       | AD Sunrise vs. AD Sundown     | 86.000  | 18    | 0.0103  | *    | 3u |
|                                                |                               |                                                                                               | AD Sunrise vs. AD Sundown     | 15.000  | 20    | 0.0103  | *    |    |
| KPMS EPM analysis                              | Normalized syllable frequency | Mann-Whitney U test with FDR correction                                                       | AD Sunrise vs. AD Sundown     | 17.000  | 20    | 0.0103  | *    | 3v |
|                                                |                               |                                                                                               | AD Sunrise vs. AD Sundown     | 85.000  | 18    | 0.0119  | *    |    |
| KPMS EPM analysis                              | Normalized syllable frequency | Mann-Whitney U test with FDR correction                                                       | AD Sunrise vs. AD Sundown     | 87.000  | 18    | 0.0103  | *    | 3w |
|                                                |                               |                                                                                               | AD Sunrise vs. AD Sundown     | 33.000  | 18    | 0.3920  | -    |    |
| KPMS EPM analysis                              | Normalized syllable frequency | Mann-Whitney U test with FDR correction                                                       | AD Sunrise vs. AD Sundown     | 9.000   | 20    | 0.0037  | **   | 3x |
|                                                |                               |                                                                                               | AD Sunrise vs. AD Sundown     | 82.000  | 18    | 0.0275  | *    |    |
| KPMS EPM analysis                              | Normalized syllable frequency | Mann-Whitney U test with FDR correction                                                       | AD Sunrise vs. AD Sundown     | 9.000   | 20    | 0.0037  | **   | 3y |
|                                                |                               |                                                                                               | AD Sunrise vs. AD Sundown     | 88.000  | 22    | 0.3484  | -    |    |
| KPMS EPM analysis                              | Normalized syllable frequency | Mann-Whitney U test with FDR correction                                                       | AD Sunrise vs. AD Sundown     | 58.000  | 22    | 0.6689  | -    | 3z |
|                                                |                               |                                                                                               | AD Sunrise vs. AD Sundown     | 85.000  | 22    | 0.4022  | -    |    |
| KPMS EPM analysis                              | Normalized syllable frequency | Mann-Whitney U test with FDR correction                                                       | AD Sunrise vs. AD Sundown     | 64.000  | 22    | 0.9070  | -    | 4a |
|                                                |                               |                                                                                               | AD Sunrise vs. AD Sundown     | 91.000  | 22    | 0.3001  | -    |    |
| KPMS EPM analysis                              | Normalized syllable frequency | Mann-Whitney U test with FDR correction                                                       | AD Sunrise vs. AD Sundown     | 65.000  | 22    | 0.9070  | -    | 4b |
|                                                |                               |                                                                                               | AD Sunrise vs. AD Sundown     | 58.000  | 22    | 0.6689  | -    |    |
| KPMS EPM analysis                              | Normalized syllable frequency | Mann-Whitney U test with FDR correction                                                       | AD Sunrise vs. AD Sundown     | 47.000  | 22    | 0.3484  | -    | 4c |
|                                                |                               |                                                                                               | AD Sunrise vs. AD Sundown     | 28.000  | 22    | 0.0575  | -    |    |
| KPMS EPM analysis                              | Normalized syllable frequency | Mann-Whitney U test with FDR correction                                                       | AD Sunrise vs. AD Sundown     | 36.000  | 21    | 0.2498  | -    | 4d |
|                                                |                               |                                                                                               | AD Sunrise vs. AD Sundown     | 93.000  | 19    | 0.0276  | *    |    |
| KPMS EPM analysis                              | Normalized syllable frequency | Mann-Whitney U test with FDR correction                                                       | AD Sunrise vs. AD Sundown     | 36.000  | 22    | 0.1512  | -    | 4e |
|                                                |                               |                                                                                               | AD Sunrise vs. AD Sundown     | 29.000  | 22    | 0.0575  | -    |    |
| KPMS EPM analysis                              | Normalized syllable frequency | Mann-Whitney U test with FDR correction                                                       | AD Sunrise vs. AD Sundown     | 80.000  | 18    | 0.0575  | -    | 4f |
|                                                |                               |                                                                                               | AD Sunrise vs. AD Sundown     | 108.000 | 21    | 0.0276  | *    |    |
| KPMS EPM analysis                              | Normalized syllable frequency | Mann-Whitney U test with FDR correction                                                       | AD Sunrise vs. AD Sundown     | 32.000  | 18    | 0.4022  | -    | 4g |
|                                                |                               |                                                                                               | AD Sunrise vs. AD Sundown     | 25.000  | 22    | 0.0479  | *    |    |
| KPMS EPM analysis                              | Normalized syllable frequency | Mann-Whitney U test with FDR correction                                                       | AD Sunrise vs. AD Sundown     | 76.000  | 19    | 0.2498  | -    | 4h |
|                                                |                               |                                                                                               | AD Sunrise vs. AD Sundown     | 21.000  | 22    | 0.0276  | *    |    |
| KPMS EPM analysis                              | Syllable 10 frequency         | Two-way ANOVA                                                                                 | Period                        | 7.875   | 1, 45 | 0.0409  | *    | 4i |
|                                                |                               |                                                                                               | Genotype                      | 7.925   | 1, 45 | 0.0074  | **   |    |
| KPMS EPM analysis                              | Syllable 10 frequency         | Two-way ANOVA                                                                                 | Period x Genotype             | 4.429   | 1, 45 | 0.0072  | **   | 4j |
|                                                |                               |                                                                                               | Sunrise:Ctrl vs. Sunrise:AD   | 0.730   | 45    | 0.9548  | -    |    |
| KPMS EPM analysis                              | Syllable 10 frequency         | Tukey's multiple comparisons tests                                                            | Sunrise:Ctrl vs. Sundown:Ctrl | 0.745   | 45    | 0.9522  | -    | 4k |
|                                                |                               |                                                                                               | Sunrise:Ctrl vs. Sundown:AD   | 5.241   | 45    | 0.0031  | **   |    |
| KPMS EPM analysis                              | Syllable 10 frequency         | Tukey's multiple comparisons tests                                                            | Sunrise:AD vs. Sundown:Ctrl   | 0.010   | 45    | >0.9999 | -    | 4l |
|                                                |                               |                                                                                               | Sunrise:AD vs. Sundown:AD     | 4.656   | 45    | 0.0101  | *    |    |
| KPMS EPM analysis                              | Syllable 10 frequency         | Tukey's multiple comparisons tests                                                            | Sundown:Ctrl vs. Sundown:AD   | 4.797   | 45    | 0.0077  | **   | 4m |
|                                                |                               |                                                                                               | Period                        | 8.528   | 1, 45 | 0.0054  | **   |    |
| KPMS EPM analysis                              | Syllable 13 frequency         | Two-way ANOVA                                                                                 | Genotype                      | 8.018   | 1, 45 | 0.0069  | **   | 4n |
|                                                |                               |                                                                                               | Period x Genotype             | 3.869   | 1, 45 | 0.0554  | -    |    |
| KPMS EPM analysis                              | Syllable 13 frequency         | Two-way ANOVA                                                                                 | Sunrise:Ctrl vs. Sunrise:AD   | 0.888   | 45    | 0.9226  | -    | 4o |
|                                                |                               |                                                                                               | Sunrise:Ctrl vs. Sundown:Ctrl | 1.012   | 45    | 0.8904  | -    |    |
| KPMS EPM analysis                              | Syllable 13 frequency         | Tukey's multiple comparisons tests (conducted based on trends observed and a priori interest) | Sunrise:Ctrl vs. Sundown:AD   | 5.363   | 45    | 0.0024  | **   | 4p |
|                                                |                               |                                                                                               | Sunrise:AD vs. Sundown:Ctrl   | 0.096   | 45    | 0.9999  | -    |    |
| KPMS EPM analysis                              | Syllable 13 frequency         | Tukey's multiple comparisons tests                                                            | Sunrise:AD vs. Sundown:AD     | 4.634   | 45    | 0.0106  | *    | 4q |
|                                                |                               |                                                                                               | Sundown:Ctrl vs. Sundown:AD   | 4.679   | 45    | 0.0097  | **   |    |
| KPMS EPM analysis                              | Syllable 13 frequency         | Two-way ANOVA                                                                                 | Period                        | 8.506   | 1, 45 | 0.0055  | **   | 4r |
|                                                |                               |                                                                                               | Genotype                      | 7.405   | 1, 45 | 0.0092  | **   |    |
| KPMS EPM analysis                              | Syllable 13 frequency         | Two-way ANOVA                                                                                 | Period x Genotype             | 4.181   | 1, 45 | 0.0467  | *    | 4s |

|                                                    |                                                                    |                                                                          |                                                                          |          |         |         |                         |      |                         |
|----------------------------------------------------|--------------------------------------------------------------------|--------------------------------------------------------------------------|--------------------------------------------------------------------------|----------|---------|---------|-------------------------|------|-------------------------|
|                                                    | Syllable 14 frequency                                              | Tukey's multiple comparisons tests                                       | Sunrise:Ctrl vs. Sunrise:AD                                              | 0.695    | 45      | 0.9607  | -                       | 3i   |                         |
|                                                    |                                                                    |                                                                          | Sunrise:Ctrl vs. Sundown:Ctrl                                            | 0.925    | 45      | 0.9135  | -                       |      |                         |
|                                                    |                                                                    |                                                                          | Sunrise:Ctrl vs. Sundown:AD                                              | 5.256    | 45      | 0.0030  | **                      |      |                         |
|                                                    |                                                                    |                                                                          | Sunrise:AD vs. Sundown:Ctrl                                              | 0.212    | 45      | 0.9988  | -                       |      |                         |
|                                                    |                                                                    |                                                                          | Sunrise:AD vs. Sundown:AD                                                | 4.704    | 45      | 0.0092  | **                      |      |                         |
|                                                    |                                                                    |                                                                          | Sundown:Ctrl vs. Sundown:AD                                              | 4.647    | 45      | 0.0103  | *                       |      |                         |
| SCN subpopulation analysis                         | Core c-Fos+ cells / mm3 (x 1000)                                   | Two-way ANOVA                                                            | Period                                                                   | 15.390   | 1, 21   | 0.0008  | ***                     | 4o   |                         |
|                                                    |                                                                    |                                                                          | Genotype                                                                 | 0.051    | 1, 21   | 0.8238  | -                       |      |                         |
|                                                    |                                                                    |                                                                          | Period x Genotype                                                        | 2.353    | 1, 21   | 0.1399  | -                       |      |                         |
|                                                    | Shell c-Fos+ cells / mm3 (x 1000)                                  | Two-way ANOVA                                                            | Period                                                                   | 8.719    | 1, 21   | 0.0076  | **                      | 4p   |                         |
|                                                    |                                                                    |                                                                          | Genotype                                                                 | 2.274    | 1, 21   | 0.1465  | -                       |      |                         |
|                                                    |                                                                    |                                                                          | Period x Genotype                                                        | 0.132    | 1, 21   | 0.7205  | -                       |      |                         |
|                                                    | Core VIP+ cells / mm3 (x 1000)                                     | Two-way ANOVA                                                            | Period                                                                   | 0.758    | 1, 21   | 0.3937  | -                       | 4q   |                         |
|                                                    |                                                                    |                                                                          | Genotype                                                                 | 1.610    | 1, 21   | 0.2184  | -                       |      |                         |
|                                                    |                                                                    |                                                                          | Period x Genotype                                                        | 0.823    | 1, 21   | 0.3746  | -                       |      |                         |
|                                                    | Shell AVP+ cells / mm3 (x 1000)                                    | Two-way ANOVA                                                            | Period                                                                   | 0.511    | 1, 21   | 0.4825  | -                       | 4r   |                         |
|                                                    |                                                                    |                                                                          | Genotype                                                                 | 0.016    | 1, 21   | 0.9011  | -                       |      |                         |
|                                                    |                                                                    |                                                                          | Period x Genotype                                                        | 1.281    | 1, 21   | 0.2705  | -                       |      |                         |
|                                                    | (VIP+c-Fos+)/VIP+                                                  | Two-way ANOVA                                                            | Period                                                                   | 2.152    | 1, 21   | 0.0197  | *                       | 4s   |                         |
|                                                    |                                                                    |                                                                          | Genotype                                                                 | 6.370    | 1, 21   | 0.2355  | -                       |      |                         |
|                                                    |                                                                    |                                                                          | Period x Genotype                                                        | 1.491    | 1, 21   | 0.1572  | -                       |      |                         |
|                                                    | (AVP+c-Fos+)/AVP+                                                  | Two-way ANOVA                                                            | Period                                                                   | 16.340   | 1, 21   | 0.0006  | ***                     | 4t   |                         |
|                                                    |                                                                    |                                                                          | Genotype                                                                 | 8.236    | 1, 21   | 0.0092  | **                      |      |                         |
|                                                    |                                                                    |                                                                          | Period x Genotype                                                        | 5.240    | 1, 21   | 0.0325  | *                       |      |                         |
|                                                    |                                                                    | Tukey's multiple comparisons tests                                       | Sunrise:Ctrl vs. Sunrise:AD                                              | 5.296    | 21      | 0.0061  | **                      |      |                         |
|                                                    |                                                                    |                                                                          | Sunrise:Ctrl vs. Sundown:Ctrl                                            | 5.971    | 21      | 0.0020  | **                      |      |                         |
|                                                    |                                                                    |                                                                          | Sunrise:Ctrl vs. Sundown:AD                                              | 7.095    | 21      | 0.0003  | ***                     |      |                         |
|                                                    |                                                                    |                                                                          | Sunrise:AD vs. Sundown:Ctrl                                              | 1.143    | 21      | 0.8498  | -                       |      |                         |
|                                                    |                                                                    |                                                                          | Sunrise:AD vs. Sundown:AD                                                | 1.873    | 21      | 0.5584  | -                       |      |                         |
|                                                    |                                                                    |                                                                          | Sundown:Ctrl vs. Sundown:AD                                              | 0.567    | 21      | 0.9777  | -                       |      |                         |
| Period                                             |                                                                    |                                                                          | 4.670                                                                    | 1, 12    | 0.0516  | -       |                         |      |                         |
| Brain-wide activity mapping at Sundown and Sunrise | Total open arm time                                                | Mixed (Two-way repeated measures) ANOVA                                  | Genotype                                                                 | 5.544    | 1, 12   | 0.0364  | *                       | 5b   |                         |
|                                                    |                                                                    |                                                                          | Period x Genotype                                                        | 0.890    | 1, 12   | 0.3842  | -                       |      |                         |
|                                                    |                                                                    |                                                                          | Subject                                                                  | 0.998    | 12, 12  | 0.5014  | -                       |      |                         |
|                                                    |                                                                    | Fischer's LSD (conducted based on trends observed and a priori interest) | Sunrise:Ctrl vs. Sunrise:AD                                              | 0.997    | 24      | 0.3288  | -                       |      |                         |
|                                                    |                                                                    |                                                                          | Sundown:Ctrl vs. Sundown:AD                                              | 2.331    | 24      | 0.0285  | *                       |      |                         |
|                                                    |                                                                    |                                                                          | Sunrise:Ctrl vs. Sundown:Ctrl                                            | 0.806    | 12      | 0.4362  | -                       |      |                         |
|                                                    | Sunrise:AD vs. Sundown:AD                                          | 2.371                                                                    | 12                                                                       | 0.0353   | *       |         |                         |      |                         |
|                                                    | All regions (eYFP): absolute correlation coefficient (Pearson's r) | Unpaired t-test, two-tailed                                              | Ctrl vs. AD                                                              | 36.040   | 18791   | <0.0001 | ****                    | 5h   |                         |
|                                                    |                                                                    |                                                                          | Cluster 1 regions (eYFP): absolute correlation coefficient (Pearson's r) | 6.027    | 1637    | <0.0001 | ****                    | 5k   |                         |
|                                                    | Piezo-sleep recordings                                             | Amplitude                                                                | Two-way ANOVA                                                            | Age      | 8.188   | 3, 163  | <0.0001                 | **** | Extended data figure 1f |
| Genotype                                           |                                                                    |                                                                          |                                                                          | 0.149    | 1, 163  | 0.8999  | -                       |      |                         |
| Age x Genotype                                     |                                                                    |                                                                          |                                                                          | 4.856    | 3, 163  | 0.0029  | **                      |      |                         |
| 2:Ctrl vs. 2:AD                                    |                                                                    |                                                                          |                                                                          | 4.062    | 163     | 0.0046  | **                      |      |                         |
| 6:Ctrl vs. 6:AD                                    |                                                                    |                                                                          |                                                                          | 1.352    | 163     | 0.3403  | -                       |      |                         |
| 12:Ctrl vs. 12:AD                                  |                                                                    |                                                                          |                                                                          | 3.054    | 163     | 0.0323  | *                       |      |                         |
| 24:Ctrl vs. 24:AD                                  |                                                                    |                                                                          |                                                                          | 1.301    | 163     | 0.3588  | -                       |      |                         |
| 2:Ctrl vs. 6:Ctrl                                  |                                                                    |                                                                          |                                                                          | 0.051    | 163     | >0.9999 | -                       |      |                         |
| 2:Ctrl vs. 12:Ctrl                                 |                                                                    |                                                                          |                                                                          | 0.320    | 163     | 0.9959  | -                       |      |                         |
| 2:Ctrl vs. 24:Ctrl                                 |                                                                    |                                                                          |                                                                          | 1.781    | 163     | 0.5900  | -                       |      |                         |
| 6:Ctrl vs. 12:Ctrl                                 |                                                                    |                                                                          |                                                                          | 0.283    | 163     | 0.9971  | -                       |      |                         |
| 6:Ctrl vs. 24:Ctrl                                 |                                                                    |                                                                          |                                                                          | 1.822    | 163     | 0.5716  | -                       |      |                         |
| 12:Ctrl vs. 24:Ctrl                                |                                                                    |                                                                          | 1.599                                                                    | 163      | 0.6713  | -       |                         |      |                         |
| 2:AD vs. 6:AD                                      |                                                                    |                                                                          | 2.659                                                                    | 163      | 0.2406  | *       |                         |      |                         |
| 2:AD vs. 12:AD                                     |                                                                    |                                                                          | 7.283                                                                    | 163      | <0.0001 | ****    |                         |      |                         |
| 2:AD vs. 24:AD                                     |                                                                    |                                                                          | 6.285                                                                    | 163      | <0.0001 | ****    |                         |      |                         |
| 6:AD vs. 12:AD                                     |                                                                    |                                                                          | 4.271                                                                    | 163      | 0.0154  | *       |                         |      |                         |
| 6:AD vs. 24:AD                                     |                                                                    |                                                                          | 3.811                                                                    | 163      | 0.0386  | *       |                         |      |                         |
| 12:AD vs. 24:AD                                    |                                                                    |                                                                          | 0.214                                                                    | 163      | 0.9988  | -       |                         |      |                         |
| Acrophase                                          |                                                                    |                                                                          | Two-way ANOVA                                                            | 2 vs. 6  | 1.998   | 163     | 0.4933                  | -    |                         |
|                                                    |                                                                    |                                                                          |                                                                          | 2 vs. 12 | 5.502   | 163     | 0.0008                  | ***  |                         |
|                                                    |                                                                    |                                                                          |                                                                          | 2 vs. 24 | 5.938   | 163     | 0.0003                  | ***  |                         |
|                                                    |                                                                    |                                                                          |                                                                          | 6 vs. 12 | 3.426   | 163     | 0.0769                  | -    |                         |
|                                                    |                                                                    |                                                                          |                                                                          | 6 vs. 24 | 4.121   | 163     | 0.0210                  | *    |                         |
|                                                    |                                                                    | 12 vs. 24                                                                |                                                                          | 1.169    | 163     | 0.8418  | -                       |      |                         |
|                                                    |                                                                    | Two-way ANOVA                                                            | Age                                                                      | 2.284    | 3, 162  | 0.0810  | -                       |      |                         |
|                                                    |                                                                    |                                                                          | Genotype                                                                 | 0.001    | 1, 162  | 0.9698  | -                       |      |                         |
|                                                    |                                                                    |                                                                          | Age x Genotype                                                           | 2.157    | 3, 162  | 0.0951  | -                       |      |                         |
|                                                    |                                                                    |                                                                          | Age                                                                      | 10.780   | 3, 164  | <0.0001 | ****                    |      |                         |
|                                                    |                                                                    |                                                                          | Genotype                                                                 | 5.320    | 1, 164  | 0.0223  | *                       |      |                         |
|                                                    |                                                                    |                                                                          | Age x Genotype                                                           | 3.775    | 3, 164  | 0.0118  | *                       |      |                         |
| Light Cycle Sleep (%)                              |                                                                    | Two-way ANOVA                                                            | 2:Ctrl vs. 2:AD                                                          | 2.437    | 164     | 0.0868  | -                       |      |                         |
|                                                    |                                                                    |                                                                          | 6:Ctrl vs. 6:AD                                                          | 2.374    | 164     | 0.0951  | -                       |      |                         |
|                                                    |                                                                    |                                                                          | 12:Ctrl vs. 12:AD                                                        | 3.393    | 164     | 0.0176  | *                       |      |                         |
|                                                    |                                                                    |                                                                          | 24:Ctrl vs. 24:AD                                                        | 3.147    | 164     | 0.0274  | *                       |      |                         |
|                                                    |                                                                    |                                                                          | 2:Ctrl vs. 6:Ctrl                                                        | 5.103    | 164     | 0.0023  | **                      |      |                         |
|                                                    |                                                                    |                                                                          | 2:Ctrl vs. 12:Ctrl                                                       | 0.173    | 164     | 0.9993  | -                       |      |                         |
|                                                    |                                                                    | Tukey's multiple comparisons tests                                       | 2:Ctrl vs. 24:Ctrl                                                       | 1.021    | 164     | 0.8884  | -                       |      |                         |
|                                                    |                                                                    |                                                                          | 6:Ctrl vs. 12:Ctrl                                                       | 5.360    | 164     | 0.0012  | **                      |      |                         |
|                                                    |                                                                    |                                                                          | 6:Ctrl vs. 24:Ctrl                                                       | 4.093    | 164     | 0.0222  | *                       |      |                         |
|                                                    |                                                                    |                                                                          | 12:Ctrl vs. 24:Ctrl                                                      | 0.926    | 164     | 0.9137  | -                       |      |                         |
|                                                    |                                                                    |                                                                          | 2:AD vs. 6:AD                                                            | 0.053    | 164     | >0.9999 | -                       |      |                         |
|                                                    |                                                                    |                                                                          | 2:AD vs. 12:AD                                                           | 5.466    | 164     | 0.0009  | ***                     |      |                         |
|                                                    |                                                                    |                                                                          | 2:AD vs. 24:AD                                                           | 4.338    | 164     | 0.0133  | *                       |      |                         |
|                                                    |                                                                    |                                                                          | 6:AD vs. 12:AD                                                           | 5.297    | 164     | 0.0014  | **                      |      |                         |
|                                                    |                                                                    |                                                                          | 6:AD vs. 24:AD                                                           | 4.258    | 164     | 0.0158  | *                       |      |                         |
|                                                    |                                                                    |                                                                          | 12:AD vs. 24:AD                                                          | 0.224    | 164     | 0.9986  | -                       |      |                         |
|                                                    |                                                                    |                                                                          | Tukey's multiple comparisons tests (age only)                            | 2 vs. 6  | 3.481   | 164     | 0.0700                  | -    |                         |
|                                                    | 2 vs. 12                                                           |                                                                          |                                                                          | 3.845    | 164     | 0.0361  | *                       |      |                         |
| 2 vs. 24                                           | 2.659                                                              | 164                                                                      |                                                                          | 0.2405   | -       |         |                         |      |                         |
| 6 vs. 12                                           | 7.510                                                              | 164                                                                      |                                                                          | <0.0001  | ****    |         |                         |      |                         |
| 6 vs. 24                                           | 5.874                                                              | 164                                                                      |                                                                          | 0.0003   | ***     |         |                         |      |                         |
| 12 vs. 24                                          | 0.752                                                              | 164                                                                      |                                                                          | 0.9513   | -       |         |                         |      |                         |
| Dark Cycle Sleep (%)                               | Two-way ANOVA                                                      | Age                                                                      | 4.991                                                                    | 3, 164   | 0.0024  | **      | Extended data figure 1i |      |                         |
|                                                    |                                                                    | Genotype                                                                 | 5.364                                                                    | 1, 164   | 0.0218  | *       |                         |      |                         |
|                                                    |                                                                    | Age x Genotype                                                           | 1.357                                                                    | 3, 164   | 0.2580  | -       |                         |      |                         |
|                                                    | Tukey's multiple comparisons tests (age only)                      | 2 vs. 6                                                                  | 4.384                                                                    | 164      | 0.0121  | *       |                         |      |                         |
|                                                    |                                                                    | 2 vs. 12                                                                 | 4.654                                                                    | 164      | 0.0066  | **      |                         |      |                         |
|                                                    |                                                                    | 2 vs. 24                                                                 | 4.288                                                                    | 164      | 0.0148  | *       |                         |      |                         |
| Two-way ANOVA                                      | 6 vs. 12                                                           | 0.072                                                                    | 164                                                                      | >0.9999  | -       |         |                         |      |                         |
|                                                    | 6 vs. 24                                                           | 0.260                                                                    | 164                                                                      | 0.9978   | -       |         |                         |      |                         |
|                                                    | 12 vs. 24                                                          | 0.204                                                                    | 164                                                                      | 0.9989   | -       |         |                         |      |                         |
|                                                    | Age                                                                | 16.070                                                                   | 3, 164                                                                   | <0.0001  | ****    |         |                         |      |                         |
|                                                    | Genotype                                                           | 15.340                                                                   | 1, 164                                                                   | 0.0001   | ***     |         |                         |      |                         |
|                                                    | Age x Genotype                                                     | 4.266                                                                    | 3, 164                                                                   | 0.0062   | **      |         |                         |      |                         |

|                           |                            |                                    |                     |                                            |                   |         |                         |                         |                         |     |                         |
|---------------------------|----------------------------|------------------------------------|---------------------|--------------------------------------------|-------------------|---------|-------------------------|-------------------------|-------------------------|-----|-------------------------|
|                           | Light Cycle Sleep Bout (s) | Tukey's multiple comparisons tests | 2:Ctrl vs. 2:AD     | 0.876                                      | 164               | 0.5367  | -                       | Extended data figure 1j |                         |     |                         |
|                           |                            |                                    | 6:Ctrl vs. 6:AD     | 6.277                                      | 164               | <0.0001 | ****                    |                         |                         |     |                         |
|                           |                            |                                    | 12:Ctrl vs. 12:AD   | 3.022                                      | 164               | 0.0341  | *                       |                         |                         |     |                         |
|                           |                            |                                    | 24:Ctrl vs. 24:AD   | 2.755                                      | 164               | 0.0531  | -                       |                         |                         |     |                         |
|                           |                            |                                    | 2:Ctrl vs. 6:Ctrl   | 3.867                                      | 164               | 0.0347  | *                       |                         |                         |     |                         |
|                           |                            |                                    | 2:Ctrl vs. 12:Ctrl  | 2.090                                      | 164               | 0.4532  | -                       |                         |                         |     |                         |
|                           |                            |                                    | 2:Ctrl vs. 24:Ctrl  | 4.045                                      | 164               | 0.0244  | *                       |                         |                         |     |                         |
|                           |                            |                                    | 6:Ctrl vs. 12:Ctrl  | 6.418                                      | 164               | <0.0001 | ****                    |                         |                         |     |                         |
|                           |                            |                                    | 6:Ctrl vs. 24:Ctrl  | 8.177                                      | 164               | <0.0001 | ****                    |                         |                         |     |                         |
|                           |                            |                                    | 12:Ctrl vs. 24:Ctrl | 2.247                                      | 164               | 0.3877  | -                       |                         |                         |     |                         |
|                           | 2:AD vs. 6:AD              | 3.301                              | 164                 | 0.0946                                     | -                 |         |                         |                         |                         |     |                         |
|                           | 2:AD vs. 12:AD             | 5.675                              | 164                 | 0.0005                                     | ***               |         |                         |                         |                         |     |                         |
|                           | 2:AD vs. 24:AD             | 6.889                              | 164                 | <0.0001                                    | ****              |         |                         |                         |                         |     |                         |
|                           | 6:AD vs. 12:AD             | 2.074                              | 164                 | 0.4600                                     | -                 |         |                         |                         |                         |     |                         |
|                           | 6:AD vs. 24:AD             | 3.845                              | 164                 | 0.0362                                     | *                 |         |                         |                         |                         |     |                         |
|                           | 12:AD vs. 24:AD            | 2.191                              | 164                 | 0.4108                                     | -                 |         |                         |                         |                         |     |                         |
|                           | 2 vs. 6                    | 0.171                              | 164                 | 0.9994                                     | -                 |         |                         |                         |                         |     |                         |
|                           | 2 vs. 12                   | 5.555                              | 164                 | 0.0007                                     | ***               |         |                         |                         |                         |     |                         |
|                           | 2 vs. 24                   | 7.875                              | 164                 | <0.0001                                    | ****              |         |                         |                         |                         |     |                         |
|                           | 6 vs. 12                   | 5.754                              | 164                 | 0.0004                                     | ***               |         |                         |                         |                         |     |                         |
| 6 vs. 24                  | 8.054                      | 164                                | <0.0001             | ****                                       |                   |         |                         |                         |                         |     |                         |
| 12 vs. 24                 | 3.113                      | 164                                | 0.1272              | -                                          |                   |         |                         |                         |                         |     |                         |
| Age                       | 1.608                      | 3, 165                             | 0.1895              | -                                          |                   |         |                         |                         |                         |     |                         |
| Genotype                  | 17.550                     | 1, 165                             | <0.0001             | ****                                       |                   |         |                         |                         |                         |     |                         |
| Age x Genotype            | 0.834                      | 3, 165                             | 0.4769              | -                                          |                   |         |                         |                         |                         |     |                         |
| Dark Cycle Sleep Bout (s) | Two-way ANOVA              |                                    |                     |                                            |                   |         | Extended data figure 1k |                         |                         |     |                         |
| EEG/EMG recordings        |                            | Unpaired t -test, two-tailed       | 2:Ctrl vs. 2:AD     | Mean no. bouts per day in Wake             | 2,314             | 15      | 0.0353                  | *                       | Extended data figure 2c |     |                         |
|                           |                            |                                    |                     | Mean no. bouts per day in NREM             | 2,428             | 15      | 0.0282                  | *                       |                         |     |                         |
|                           |                            |                                    |                     | Mean no. bouts per day in REM              | 2,334             | 15      | 0.0339                  | *                       |                         |     |                         |
|                           |                            |                                    |                     | Wake-NREM transitions per day              | 2,451             | 15      | 0.0270                  | *                       |                         |     |                         |
|                           |                            |                                    |                     | NREM-REM transitions per day               | 2,426             | 15      | 0.0283                  | *                       |                         |     |                         |
|                           |                            |                                    |                     | NREM-Wake transitions per day              | 0,353             | 15      | 0.7288                  | -                       |                         |     |                         |
|                           |                            |                                    |                     | REM-NREM transitions per day               | 1,540             | 15      | 0.1444                  | -                       |                         |     |                         |
|                           |                            |                                    |                     | REM-Wake transitions per day               | 2,292             | 15      | 0.0368                  | *                       |                         |     |                         |
|                           |                            |                                    |                     | Time per light cycle in Wake               | 2,013             | 15      | 0.0625                  | -                       |                         |     |                         |
|                           |                            |                                    |                     | Time per light cycle in NREM               | 2,008             | 15      | 0.0630                  | -                       |                         |     |                         |
|                           |                            |                                    |                     | Time per light cycle in REM                | 0,900             | 15      | 0.3824                  | -                       |                         |     |                         |
|                           |                            |                                    |                     | Time per dark cycle in Wake                | 2,109             | 15      | 0.0522                  | -                       |                         |     |                         |
|                           |                            |                                    |                     | Time per dark cycle in NREM                | 2,175             | 15      | 0.0461                  | *                       |                         |     |                         |
|                           |                            |                                    |                     | Time per dark cycle in REM                 | 0,423             | 15      | 0.6780                  | -                       |                         |     |                         |
|                           |                            |                                    |                     | Bouts per light cycle in Wake              | 3,417             | 15      | 0.0038                  | **                      |                         |     |                         |
|                           |                            |                                    |                     | Bouts per light cycle in NREM              | 3,347             | 15      | 0.0044                  | **                      |                         |     |                         |
|                           |                            |                                    |                     | Bouts per light cycle in REM               | 2,639             | 15      | 0.0186                  | *                       |                         |     |                         |
|                           |                            |                                    |                     | Bouts per dark cycle in Wake               | 0,457             | 15      | 0.6544                  | -                       |                         |     |                         |
|                           |                            |                                    |                     | Bouts per dark cycle in NREM               | 0,540             | 15      | 0.5971                  | -                       |                         |     |                         |
|                           |                            |                                    |                     | Bouts per dark cycle in REM                | 1,242             | 15      | 0.2332                  | -                       |                         |     |                         |
|                           |                            |                                    |                     | Mean bout duration per light cycle in Wake | 0,989             | 15      | 0.3383                  | -                       |                         |     |                         |
|                           |                            |                                    |                     | Mean bout duration per light cycle in NREM | 3,414             | 15      | 0.0038                  | **                      |                         |     |                         |
|                           |                            |                                    |                     | Mean bout duration per light cycle in REM  | 2,352             | 15      | 0.0327                  | *                       |                         |     |                         |
|                           |                            |                                    |                     | Mean bout duration per dark cycle in Wake  | 1,303             | 15      | 0.2122                  | -                       |                         |     |                         |
|                           |                            |                                    |                     | Mean bout duration per dark cycle in NREM  | 2,446             | 15      | 0.0273                  | *                       |                         |     |                         |
|                           |                            |                                    |                     | Mean bout duration per dark cycle in REM   | 2,121             | 15      | 0.0510                  | -                       |                         |     |                         |
|                           |                            |                                    |                     | Mean no. bouts per day in Wake             | 0,481             | 14      | 0.6379                  | -                       |                         |     |                         |
|                           |                            |                                    |                     | Mean no. bouts per day in NREM             | 0,790             | 14      | 0.4425                  | -                       |                         |     |                         |
|                           |                            |                                    |                     | Mean no. bouts per day in REM              | 1,004             | 14      | 0.3326                  | -                       |                         |     |                         |
|                           |                            |                                    |                     | Wake-NREM transitions per day              | 1,409             | 14      | 0.1807                  | -                       |                         |     |                         |
|                           |                            |                                    |                     | NREM-REM transitions per day               | 2,256             | 14      | 0.0406                  | -                       |                         |     |                         |
|                           |                            |                                    |                     | NREM-Wake transitions per day              | 0,029             | 14      | 0.9789                  | -                       |                         |     |                         |
|                           |                            |                                    |                     | REM-NREM transitions per day               | 0,296             | 14      | 0.7719                  | -                       |                         |     |                         |
|                           |                            |                                    |                     | REM-Wake transitions per day               | 2,367             | 14      | 0.0329                  | -                       |                         |     |                         |
|                           |                            |                                    |                     | Time per light cycle in Wake               | 0,568             | 14      | 0.5794                  | -                       |                         |     |                         |
|                           |                            |                                    |                     | Time per light cycle in NREM               | 2,839             | 14      | 0.0131                  | *                       |                         |     |                         |
|                           |                            |                                    |                     | Time per light cycle in REM                | 1,931             | 14      | 0.0740                  | -                       |                         |     |                         |
|                           |                            |                                    |                     | Time per dark cycle in Wake                | 2,258             | 14      | 0.0405                  | *                       |                         |     |                         |
|                           |                            |                                    |                     | Time per dark cycle in NREM                | 3,593             | 14      | 0.0029                  | **                      |                         |     |                         |
|                           |                            |                                    |                     | Time per dark cycle in REM                 | 0,106             | 14      | 0.9171                  | -                       |                         |     |                         |
|                           |                            |                                    |                     | Bouts per light cycle in Wake              | 0,612             | 14      | 0.5501                  | -                       |                         |     |                         |
|                           |                            |                                    |                     | Bouts per light cycle in NREM              | 0,329             | 14      | 0.7468                  | -                       |                         |     |                         |
|                           |                            |                                    |                     | Bouts per light cycle in REM               | 1,620             | 14      | 0.1276                  | -                       |                         |     |                         |
|                           |                            |                                    |                     | Bouts per dark cycle in Wake               | 1,402             | 14      | 0.1826                  | -                       |                         |     |                         |
|                           |                            |                                    |                     | Bouts per dark cycle in NREM               | 1,764             | 14      | 0.0995                  | -                       |                         |     |                         |
|                           |                            |                                    |                     | Bouts per dark cycle in REM                | 0,105             | 14      | 0.9176                  | -                       |                         |     |                         |
|                           |                            |                                    |                     | Mean bout duration per light cycle in Wake | 0,006             | 14      | 0.9956                  | -                       |                         |     |                         |
|                           |                            |                                    |                     | Mean bout duration per light cycle in NREM | 1,910             | 14      | 0.0788                  | -                       |                         |     |                         |
|                           |                            |                                    |                     | Mean bout duration per light cycle in REM  | 0,161             | 14      | 0.8746                  | -                       |                         |     |                         |
|                           |                            |                                    |                     | Mean bout duration per dark cycle in Wake  | 1,899             | 14      | 0.0784                  | -                       |                         |     |                         |
|                           |                            |                                    |                     | Mean bout duration per dark cycle in NREM  | 1,055             | 14      | 0.3091                  | -                       |                         |     |                         |
|                           |                            |                                    |                     | Mean bout duration per dark cycle in REM   | 0,273             | 14      | 0.7890                  | -                       |                         |     |                         |
|                           |                            |                                    |                     | Theta power (AUC) during NREM              | 2:Ctrl vs. 2:AD   | 1,072   | 15                      | 0.3009                  |                         | -   | Extended data figure 3c |
|                           |                            |                                    |                     |                                            | 12:Ctrl vs. 12:AD | 0,921   | 14                      | 0.3726                  |                         | -   | Extended data figure 3d |
|                           |                            |                                    |                     | Alpha power (AUC) during NREM              | 2:Ctrl vs. 2:AD   | 1,521   | 15                      | 0.1490                  |                         | -   | Extended data figure 3e |
|                           |                            |                                    |                     |                                            | 12:Ctrl vs. 12:AD | 5,115   | 14                      | 0.0002                  |                         | *** | Extended data figure 3f |
|                           |                            |                                    |                     | Beta power (AUC) during NREM               | 2:Ctrl vs. 2:AD   | 1,646   | 15                      | 0.1206                  |                         | -   | Extended data figure 3g |
|                           |                            |                                    |                     |                                            | 12:Ctrl vs. 12:AD | 4,624   | 14                      | 0.0004                  |                         | *** | Extended data figure 3h |
|                           |                            |                                    |                     | Gamma power (AUC) during NREM              | 2:Ctrl vs. 2:AD   | 2,745   | 15                      | 0.0150                  |                         | *   | Extended data figure 3i |
|                           |                            |                                    |                     |                                            | 12:Ctrl vs. 12:AD | 1,854   | 14                      | 0.0849                  |                         | -   | Extended data figure 3j |
|                           |                            |                                    |                     |                                            | 2:Ctrl vs. 2:AD   | 0,072   | 15                      | 0.9435                  |                         | -   | Extended data figure 3k |

|                                                |                                    |                                    |                                                              |                   |          |         |                         |                         |    |                         |
|------------------------------------------------|------------------------------------|------------------------------------|--------------------------------------------------------------|-------------------|----------|---------|-------------------------|-------------------------|----|-------------------------|
|                                                | Delta power (AUC) during REM       |                                    | 12:Ctrl vs. 12:AD                                            | 1.001             | 14       | 0.3337  | -                       | Extended data figure 3l |    |                         |
|                                                | Theta power (AUC) during REM       |                                    | 2:Ctrl vs. 2:AD                                              | 0.054             | 15       | 0.9577  | -                       | Extended data figure 3m |    |                         |
|                                                | Alpha power (AUC) during REM       |                                    | 12:Ctrl vs. 12:AD                                            | 2.252             | 14       | 0.0409  | *                       | Extended data figure 3n |    |                         |
|                                                |                                    |                                    | 2:Ctrl vs. 2:AD                                              | 2.483             | 15       | 0.0254  | *                       | Extended data figure 3o |    |                         |
|                                                | Beta power (AUC) during REM        |                                    | 12:Ctrl vs. 12:AD                                            | 5.238             | 14       | 0.0001  | ***                     | Extended data figure 3p |    |                         |
|                                                |                                    |                                    | 2:Ctrl vs. 2:AD                                              | 2.374             | 15       | 0.0314  | *                       | Extended data figure 3q |    |                         |
|                                                | Gamma power (AUC) during REM       |                                    | 12:Ctrl vs. 12:AD                                            | 5.866             | 14       | <0.0001 | ****                    | Extended data figure 3r |    |                         |
|                                                |                                    |                                    | 2:Ctrl vs. 2:AD                                              | 1.157             | 15       | 0.2654  | -                       | Extended data figure 3s |    |                         |
| EPM: Sundown (males)                           | Distance Traveled                  | Two-way ANOVA                      | Age                                                          | 1.925             | 2.89     | 0.0002  | ***                     | Extended data figure 4a |    |                         |
|                                                |                                    |                                    | Genotype                                                     | 9.330             | 1.89     | 0.5507  | -                       |                         |    |                         |
|                                                |                                    | Age x Genotype                     | 0.359                                                        | 2.89              | 0.1519   | -       |                         |                         |    |                         |
|                                                |                                    | Tukey's multiple comparisons tests | 2 vs. 12                                                     | 3.068             | 89       | 0.0821  | -                       |                         |    |                         |
|                                                |                                    |                                    | 2 vs. 24                                                     | 3.157             | 89       | 0.0713  | -                       |                         |    |                         |
|                                                |                                    |                                    | 12 vs. 24                                                    | 6.091             | 89       | 0.0001  | ***                     |                         |    |                         |
|                                                |                                    |                                    | Age                                                          | 2.930             | 2.70     | 0.0600  | -                       |                         |    |                         |
|                                                |                                    | EPM: Sundown (females)             | Two-way ANOVA                                                | Genotype          | 0.008    | 1.70    | 0.9273                  |                         | -  | Extended data figure 4b |
| Age x Genotype                                 | 0.711                              |                                    |                                                              | 2.70              | 0.4945   | -       |                         |                         |    |                         |
| OF: Sundown (males)                            | Center Time                        | Two-way ANOVA                      | Age                                                          | 2.813             | 2.49     | 0.0697  | -                       | Extended data figure 4d |    |                         |
|                                                |                                    |                                    | Genotype                                                     | 0.395             | 1.49     | 0.5328  | -                       |                         |    |                         |
|                                                |                                    |                                    | Age x Genotype                                               | 0.606             | 2.49     | 0.5494  | -                       |                         |    |                         |
| OF: Sundown (females)                          | Center Time                        | Two-way ANOVA                      | Age                                                          | 0.803             | 2.59     | 0.4527  | -                       | Extended data figure 4f |    |                         |
|                                                |                                    |                                    | Genotype                                                     | 5.283             | 1.59     | 0.0251  | *                       |                         |    |                         |
|                                                |                                    |                                    | Age x Genotype                                               | 2.288             | 2.59     | 0.1104  | -                       |                         |    |                         |
| OF: Sunrise (males)                            | Center Time                        | Two-way ANOVA                      | Age                                                          | 1.046             | 2.37     | 0.3614  | -                       | Extended data figure 4j |    |                         |
|                                                |                                    |                                    | Genotype                                                     | 0.237             | 1.37     | 0.6293  | -                       |                         |    |                         |
|                                                |                                    |                                    | Age x Genotype                                               | 2.565             | 2.37     | 0.0905  | -                       |                         |    |                         |
| OF: Sunrise (females)                          | Center Time                        | Two-way ANOVA                      | Age                                                          | 2.616             | 2.47     | 0.0837  | -                       | Extended data figure 4i |    |                         |
|                                                |                                    |                                    | Genotype                                                     | 0.865             | 1.47     | 0.3570  | -                       |                         |    |                         |
|                                                |                                    |                                    | Age x Genotype                                               | 0.907             | 2.47     | 0.4106  | -                       |                         |    |                         |
| EPM: Sunrise (males)                           | Distance Traveled                  | Two-way ANOVA                      | Age                                                          | 36.350            | 2.57     | <0.0001 | ****                    | Extended data figure 4g |    |                         |
|                                                |                                    |                                    | Genotype                                                     | 2.712             | 1.57     | 0.1051  | -                       |                         |    |                         |
|                                                |                                    | Age x Genotype                     | 3.242                                                        | 2.57              | 0.0464   | *       |                         |                         |    |                         |
|                                                |                                    | Tukey's multiple comparisons tests | 2:Ctrl vs. 2:AD                                              | 1.642             | 57       | 0.8532  | -                       |                         |    |                         |
|                                                |                                    |                                    | 2:Ctrl vs. 12:Ctrl                                           | 0.800             | 57       | 0.9928  | -                       |                         |    |                         |
|                                                |                                    |                                    | 2:Ctrl vs. 12:AD                                             | 0.658             | 57       | 0.9971  | -                       |                         |    |                         |
|                                                |                                    |                                    | 2:Ctrl vs. 24:Ctrl                                           | 6.750             | 57       | 0.0002  | ***                     |                         |    |                         |
|                                                |                                    |                                    | 2:Ctrl vs. 24:AD                                             | 9.473             | 57       | <0.0001 | ****                    |                         |    |                         |
|                                                |                                    |                                    | 2:AD vs. 12:Ctrl                                             | 0.888             | 57       | 0.9885  | -                       |                         |    |                         |
|                                                |                                    |                                    | 2:AD vs. 12:AD                                               | 2.183             | 57       | 0.6379  | -                       |                         |    |                         |
|                                                |                                    |                                    | 2:AD vs. 24:Ctrl                                             | 4.588             | 57       | 0.0239  | *                       |                         |    |                         |
|                                                |                                    |                                    | 2:AD vs. 24:AD                                               | 7.399             | 57       | <0.0001 | ****                    |                         |    |                         |
|                                                |                                    |                                    | 12:Ctrl vs. 12:AD                                            | 1.413             | 57       | 0.1664  | -                       |                         |    |                         |
|                                                |                                    |                                    | 12:Ctrl vs. 24:Ctrl                                          | 5.857             | 57       | 0.0015  | **                      |                         |    |                         |
|                                                |                                    |                                    | 12:Ctrl vs. 24:AD                                            | 8.864             | 57       | <0.0001 | ****                    |                         |    |                         |
|                                                |                                    |                                    | 12:AD vs. 24:Ctrl                                            | 7.117             | 57       | <0.0001 | ****                    |                         |    |                         |
|                                                |                                    |                                    | 12:AD vs. 24:AD                                              | 9.742             | 57       | <0.0001 | ****                    |                         |    |                         |
|                                                |                                    | 24:Ctrl vs. 24:AD                  | 3.466                                                        | 57                | 0.1566   | -       |                         |                         |    |                         |
| EPM: Sunrise (females)                         | Two-way ANOVA                      | Age                                | 2.682                                                        | 2.27              | 0.0866   | -       | Extended data figure 4h |                         |    |                         |
|                                                |                                    | Genotype                           | 3.490                                                        | 1.27              | 0.0726   | -       |                         |                         |    |                         |
|                                                |                                    | Age x Genotype                     | 0.691                                                        | 2.27              | 0.5098   | -       |                         |                         |    |                         |
| OF: Sunrise or Sundown (12-month-old females)  | Center Time                        | Two-way ANOVA                      | Period                                                       | 0.344             | 1.39     | 0.5611  | -                       | Extended data figure 5b |    |                         |
|                                                |                                    |                                    | Genotype                                                     | 0.274             | 1.39     | 0.6038  | -                       |                         |    |                         |
|                                                |                                    |                                    | Period x Genotype                                            | 0.656             | 1.39     | 0.4227  | -                       |                         |    |                         |
| EPM: Sunrise or Sundown (12-month-old females) | Distance Traveled                  | Two-way ANOVA                      | Period                                                       | 0.692             | 1.92     | 0.4075  | -                       | Extended data figure 5d |    |                         |
|                                                |                                    |                                    | Genotype                                                     | 7.746             | 1.92     | 0.0065  | **                      |                         |    |                         |
|                                                |                                    | Period x Genotype                  | 4.615                                                        | 1.92              | 0.0343   | *       |                         |                         |    |                         |
|                                                |                                    | Sidák's multiple comparisons tests | Sunrise:Ctrl vs. Sunrise:AD                                  | 3.348             | 92       | 0.0047  | **                      |                         |    |                         |
|                                                |                                    |                                    | Sundown:Ctrl vs. Sundown:AD                                  | 0.469             | 92       | 0.9832  | -                       |                         |    |                         |
|                                                |                                    |                                    | Sunrise:AD vs. Sundown:AD                                    | 0.905             | 92       | 0.8402  | -                       |                         |    |                         |
|                                                | Sunrise:Ctrl vs. Sundown:Ctrl      |                                    | 2.170                                                        | 92                | 0.1240   | -       |                         |                         |    |                         |
|                                                | Headdips (no.)                     | Two-way ANOVA                      | Period                                                       | 2.606             | 1.45     | 0.1134  | -                       |                         |    |                         |
|                                                |                                    |                                    | Genotype                                                     | 16.100            | 1.45     | 0.0002  | ***                     |                         |    |                         |
|                                                |                                    |                                    | Period x Genotype                                            | 1.894             | 1.45     | 0.1755  | -                       |                         |    |                         |
|                                                |                                    |                                    | Syllable 10 frequency vs. Headdips                           | 115.000           | 1.39     | <0.0001 | ****                    |                         |    |                         |
|                                                |                                    |                                    | Syllable 13 frequency vs. Headdips                           | 96.920            | 1.36     | <0.0001 | ****                    |                         |    |                         |
| Syllable 14 frequency vs. Headdips             |                                    |                                    | 114.900                                                      | 1.41              | <0.0001  | ****    |                         |                         |    |                         |
| KPMS EPM analysis                              | -                                  | Simple linear regression           | Syllable 10 frequency vs. Headdips (high performers removed) | 17.880            | 1.37     | 0.0001  | ***                     | Extended data figure 5i |    |                         |
|                                                |                                    |                                    | Syllable 13 frequency vs. Headdips (high performers removed) | 15.800            | 1.34     | 0.0003  | ***                     | Extended data figure 5j |    |                         |
|                                                |                                    |                                    | Syllable 14 frequency vs. Headdips (high performers removed) | 15.970            | 1.39     | 0.0003  | ***                     | Extended data figure 5k |    |                         |
|                                                |                                    |                                    | Syllable 8 frequency                                         | Two-way ANOVA     | Period   | 9.408   | 1.45                    | 0.0037                  | ** | Extended data figure 5l |
|                                                |                                    |                                    |                                                              |                   | Genotype | 2.840   | 1.45                    | 0.0989                  | -  |                         |
|                                                |                                    |                                    |                                                              | Period x Genotype | 9.403    | 1.45    | 0.0037                  | **                      |    |                         |
|                                                | Tukey's multiple comparisons tests | Sunrise:Ctrl vs. Sunrise:AD        |                                                              | 1.419             | 45       | 0.7484  | -                       |                         |    |                         |
|                                                |                                    | Sunrise:Ctrl vs. Sundown:Ctrl      |                                                              | 0.001             | 45       | >0.9999 | -                       |                         |    |                         |
|                                                |                                    | Sunrise:Ctrl vs. Sundown:AD        |                                                              | 4.431             | 45       | 0.0155  | *                       |                         |    |                         |
|                                                |                                    | Sunrise:AD vs. Sundown:Ctrl        | 1.499                                                        | 45                | 0.7151   | -       |                         |                         |    |                         |
|                                                | Sunrise:AD vs. Sundown:AD          | 5.815                              | 45                                                           | 0.0009            | ***      |         |                         |                         |    |                         |
|                                                | Sundown:Ctrl vs. Sundown:AD        | 4.633                              | 45                                                           | 0.0106            | *        |         |                         |                         |    |                         |
|                                                | Syllable 12 frequency              | Two-way ANOVA                      | Period                                                       | 2.639             | 1.45     | 0.1112  | -                       | Extended data figure 5m |    |                         |
|                                                |                                    |                                    | Genotype                                                     | 2.100             | 1.45     | 0.1543  | -                       |                         |    |                         |
|                                                |                                    | Period x Genotype                  | 4.557                                                        | 1.45              | 0.0383   | *       |                         |                         |    |                         |
|                                                |                                    | Tukey's multiple comparisons tests | Sunrise:Ctrl vs. Sunrise:AD                                  | 0.704             | 45       | 0.9591  | -                       |                         |    |                         |
|                                                |                                    |                                    | Sunrise:Ctrl vs. Sundown:Ctrl                                | 0.542             | 45       | 0.9807  | -                       |                         |    |                         |
|                                                |                                    |                                    | Sunrise:Ctrl vs. Sundown:AD                                  | 2.866             | 45       | 0.1937  | -                       |                         |    |                         |
| Sunrise:AD vs. Sundown:Ctrl                    | 0.191                              |                                    | 45                                                           | 0.9991            | -        |         |                         |                         |    |                         |
| Sunrise:AD vs. Sundown:AD                      | 3.564                              | 45                                 | 0.0702                                                       | -                 |          |         |                         |                         |    |                         |
| Sundown:Ctrl vs. Sundown:AD                    | 3.494                              | 45                                 | 0.0784                                                       | -                 |          |         |                         |                         |    |                         |
| Syllable 16 frequency                          | Two-way ANOVA                      | Period                             | 17.460                                                       | 1.45              | 0.0001   | ***     | Extended data figure 5m |                         |    |                         |
|                                                |                                    | Genotype                           | 1.894                                                        | 1.45              | 0.1756   | -       |                         |                         |    |                         |
|                                                | Period x Genotype                  | 6.476                              | 1.45                                                         | 0.0144            | *        |         |                         |                         |    |                         |
|                                                | Tukey's multiple comparisons tests | Sunrise:Ctrl vs. Sunrise:AD        | 1.200                                                        | 45                | 0.8309   | -       |                         |                         |    |                         |
|                                                |                                    | Sunrise:Ctrl vs. Sundown:Ctrl      | 1.734                                                        | 45                | 0.6136   | -       |                         |                         |    |                         |
|                                                |                                    | Sunrise:Ctrl vs. Sundown:AD        | 5.179                                                        | 45                | 0.0035   | **      |                         |                         |    |                         |
| Sunrise:AD vs. Sundown:Ctrl                    |                                    | 3.041                              | 45                                                           | 0.1532            | -        |         |                         |                         |    |                         |

|                                                    |                                                                                            |                                    |                                                                          |         |        |         |      |                            |                         |
|----------------------------------------------------|--------------------------------------------------------------------------------------------|------------------------------------|--------------------------------------------------------------------------|---------|--------|---------|------|----------------------------|-------------------------|
|                                                    | Syllable 18 frequency                                                                      | Two-way ANOVA                      | Sunrise:AD vs. Sundown:AD                                                | 6.375   | 45     | 0.0003  | ***  | Extended data figure 5o    |                         |
|                                                    |                                                                                            |                                    | Sundown:Ctrl vs. Sundown:AD                                              | 3.823   | 45     | 0.0459  | *    |                            |                         |
|                                                    |                                                                                            |                                    | Period                                                                   | 9.726   | 1, 45  | 0.0032  | **   |                            |                         |
|                                                    |                                                                                            |                                    | Genotype                                                                 | 3.675   | 1, 45  | 0.0616  | -    |                            |                         |
|                                                    |                                                                                            |                                    | Period x Genotype                                                        | 4.245   | 1, 45  | 0.0452  | *    |                            |                         |
|                                                    |                                                                                            | Tukey's multiple comparisons tests | Sunrise:Ctrl vs. Sunrise:AD                                              | 0.147   | 45     | 0.9996  | -    |                            |                         |
|                                                    |                                                                                            |                                    | Sunrise:Ctrl vs. Sundown:Ctrl                                            | 1.123   | 45     | 0.8566  | -    |                            |                         |
|                                                    |                                                                                            |                                    | Sunrise:Ctrl vs. Sundown:AD                                              | 4.695   | 45     | 0.0094  | **   |                            |                         |
|                                                    |                                                                                            |                                    | Sunrise:AD vs. Sundown:Ctrl                                              | 1.304   | 45     | 0.7933  | -    |                            |                         |
|                                                    |                                                                                            |                                    | Sunrise:AD vs. Sundown:AD                                                | 4.910   | 45     | 0.0061  | **   |                            |                         |
|                                                    |                                                                                            |                                    | Sundown:Ctrl vs. Sundown:AD                                              | 3.878   | 45     | 0.0418  | *    |                            |                         |
| PLSC: sundown-active (eYFP+) ensembles             | Fixed Inertia                                                                              | Permutation analysis               | Overall relationship between behavioral and brain variables              | 112.765 | -      | 0.0002  | ***  | Extended data figure 6b, c |                         |
|                                                    |                                                                                            |                                    | Relationship between behavioral and brain variables for latent dimension | 80.457  | -      | 0.0001  | ***  |                            |                         |
|                                                    |                                                                                            |                                    | 1st eigenvalue                                                           | 17.418  | -      | 0.8888  | -    |                            |                         |
|                                                    |                                                                                            |                                    | 2nd eigenvalue                                                           | 5.245   | -      | 1.0000  | -    |                            |                         |
|                                                    |                                                                                            |                                    | 3rd eigenvalue                                                           | 5.199   | -      | 1.0000  | -    |                            |                         |
|                                                    |                                                                                            |                                    | 4th eigenvalue                                                           | 2.663   | -      | 1.0000  | -    |                            |                         |
|                                                    |                                                                                            |                                    | 5th eigenvalue                                                           | 0.860   | -      | 1.0000  | -    |                            |                         |
|                                                    |                                                                                            |                                    | 6th eigenvalue                                                           | 0.528   | -      | 1.0000  | -    |                            |                         |
|                                                    |                                                                                            |                                    | 7th eigenvalue                                                           | 0.212   | -      | 1.0000  | -    |                            |                         |
|                                                    |                                                                                            |                                    | 8th eigenvalue                                                           | 0.105   | -      | 1.0000  | -    |                            |                         |
|                                                    |                                                                                            |                                    | 9th eigenvalue                                                           | 0.075   | -      | 0.9996  | -    |                            |                         |
|                                                    |                                                                                            |                                    | 10th eigenvalue                                                          | 0.004   | -      | 0.9982  | -    |                            |                         |
| PLSC: sunrise-active (c-Fos+) ensembles            | Fixed Inertia                                                                              | Permutation analysis               | Overall relationship between behavioral and brain variables              | 145.655 | -      | 0.0007  | ***  | Extended data figure 6g, h |                         |
|                                                    |                                                                                            |                                    | Relationship between behavioral and brain variables for latent dimension | 90.173  | -      | 0.0001  | ***  |                            |                         |
|                                                    |                                                                                            |                                    | 1st eigenvalue                                                           | 21.787  | -      | 0.9562  | -    |                            |                         |
|                                                    |                                                                                            |                                    | 2nd eigenvalue                                                           | 12.749  | -      | 1.0000  | -    |                            |                         |
|                                                    |                                                                                            |                                    | 3rd eigenvalue                                                           | 10.366  | -      | 0.9992  | -    |                            |                         |
|                                                    |                                                                                            |                                    | 4th eigenvalue                                                           | 5.586   | -      | 1.0000  | -    |                            |                         |
|                                                    |                                                                                            |                                    | 5th eigenvalue                                                           | 2.631   | -      | 1.0000  | -    |                            |                         |
|                                                    |                                                                                            |                                    | 6th eigenvalue                                                           | 1.290   | -      | 1.0000  | -    |                            |                         |
|                                                    |                                                                                            |                                    | 7th eigenvalue                                                           | 0.460   | -      | 1.0000  | -    |                            |                         |
|                                                    |                                                                                            |                                    | 8th eigenvalue                                                           | 0.310   | -      | 1.0000  | -    |                            |                         |
|                                                    |                                                                                            |                                    | 9th eigenvalue                                                           | 0.290   | -      | 0.9834  | -    |                            |                         |
|                                                    |                                                                                            |                                    | 10th eigenvalue                                                          | 0.011   | -      | 0.9946  | -    |                            |                         |
| Brain-wide activity mapping at Sundown and Sunrise | Sensorimotor regions (eYFP <sup>+</sup> ): absolute correlation coefficient (Pearson's r)  | Unpaired t-test, two-tailed        | Ctrl vs. AD                                                              | 7.514   | 208    | <0.0001 | **** | Extended data figure 7c    |                         |
|                                                    | All regions (c-Fos <sup>+</sup> ): absolute correlation coefficient (Pearson's r)          |                                    |                                                                          | 9.138   | 26350  | <0.0001 | **** | Extended data figure 7h    |                         |
|                                                    | Sensorimotor regions (c-Fos <sup>+</sup> ): absolute correlation coefficient (Pearson's r) |                                    |                                                                          | 0.308   | 208    | 0.7585  | -    | Extended data figure 7k    |                         |
| EEG/EMG recordings                                 | -                                                                                          | Simple linear regression           | Hippocampal plaque burden vs. NREM delta power                           | 0.004   | 1, 6   | 0.9519  | -    | Supplementary figure 1d    |                         |
|                                                    | -                                                                                          |                                    | Cortical plaque burden vs. NREM delta power                              | 0.037   | 1, 6   | 0.8543  | -    | Supplementary figure 1e    |                         |
| Brexpirazole behavioral testing                    | OF distance traveled                                                                       | Two-way ANOVA                      | Genotype                                                                 | 2.834   | 1, 19  | 0.1086  | -    | Supplementary figure 2b    |                         |
|                                                    |                                                                                            |                                    | Dose                                                                     | 9.092   | 1, 19  | 0.0071  | **   |                            |                         |
|                                                    |                                                                                            |                                    | Genotype x Dose                                                          | 4.685   | 1, 19  | 0.0434  | *    |                            |                         |
|                                                    |                                                                                            | Tukey's multiple comparisons tests | Veh Ctrl vs. Veh AD                                                      | 5.095   | 19     | 0.0094  | **   |                            |                         |
|                                                    |                                                                                            |                                    | Veh Ctrl vs. Brex Ctrl                                                   | 0.453   | 19     | 0.9883  | -    |                            |                         |
|                                                    |                                                                                            |                                    | Veh Ctrl vs. Brex AD                                                     | 1.355   | 19     | 0.7744  | -    |                            |                         |
|                                                    |                                                                                            |                                    | Veh AD vs. Brex Ctrl                                                     | 4.622   | 19     | 0.0194  | *    |                            |                         |
|                                                    | Veh AD vs. Brex AD                                                                         | 4.119                              | 19                                                                       | 0.0407  | *      |         |      |                            |                         |
|                                                    | Brex Ctrl vs Brex AD                                                                       | 0.866                              | 19                                                                       | 0.9270  | -      |         |      |                            |                         |
|                                                    | EPM open arms time                                                                         | Two-way ANOVA                      | Genotype                                                                 | 2.834   | 1, 19  | 0.1086  | -    |                            | Supplementary figure 2c |
|                                                    |                                                                                            |                                    | Dose                                                                     | 9.092   | 1, 19  | 0.0071  | **   |                            |                         |
|                                                    |                                                                                            |                                    | Genotype x Dose                                                          | 4.685   | 1, 19  | 0.0434  | *    |                            |                         |
|                                                    |                                                                                            | Tukey's multiple comparisons tests | Veh Ctrl vs. Veh AD                                                      | 5.095   | 19     | 0.0094  | **   |                            |                         |
|                                                    |                                                                                            |                                    | Veh Ctrl vs. Brex Ctrl                                                   | 0.453   | 19     | 0.9883  | -    |                            |                         |
| Veh Ctrl vs. Brex AD                               |                                                                                            |                                    | 1.355                                                                    | 19      | 0.7744 | -       |      |                            |                         |
| Veh AD vs. Brex Ctrl                               |                                                                                            |                                    | 4.622                                                                    | 19      | 0.0194 | *       |      |                            |                         |
| Veh AD vs. Brex AD                                 | 4.119                                                                                      | 19                                 | 0.0407                                                                   | *       |        |         |      |                            |                         |
| Brex Ctrl vs Brex AD                               | 0.866                                                                                      | 19                                 | 0.9270                                                                   | -       |        |         |      |                            |                         |
