# Supplementary material for: Behavioral and brain-wide neural signatures of sundowning in Alzheimer’s disease
Source: Research Square preprint supplement (doi:10.21203/rs.3.rs-9272255/v1), 2026-04-20
Supplement: Supplementary file 5 [file d52a9a901588ed2b8fb41522.pdf]

**Extended Data Table 2 | Main and interaction effects of cognitive state and time of scan**

| Predictor                                       | SN       |                 |                  | DMN      |                 |
|-------------------------------------------------|----------|-----------------|------------------|----------|-----------------|
|                                                 | Estimate | CI              | <i>p</i> value   | Estimate | CI              |
| Intercept                                       | 0.29     | 0.228 – 0.352   | <b>&lt;0.001</b> | 0.298    | 0.251 – 0.345   |
| MCI diagnosis                                   | -0.011   | -0.058 – 0.036  | 0.641            | 0.006    | -0.029 – 0.041  |
| AD diagnosis                                    | -0.099   | -0.169 – -0.029 | <b>0.006</b>     | -0.02    | -0.073 – 0.032  |
| Time of scan                                    | -0.003   | -0.006 – -0.001 | <b>0.008</b>     | -0.001   | -0.003 – 0.001  |
| Mean framewise displacement                     | 0.165    | 0.111 – 0.219   | <b>&lt;0.001</b> | -0.035   | -0.076 – 0.005  |
| Age                                             | -0.001   | -0.001 – 0.000  | 0.088            | -0.001   | -0.001 – -0.000 |
| Gender (male)                                   | 0.028    | 0.017 – 0.039   | <b>&lt;0.001</b> | 0.014    | 0.005 – 0.022   |
| Positive history of sedative or hypnotics usage | -0.017   | -0.047 – 0.012  | 0.251            | 0        | -0.023 – 0.022  |
| Positive history of hypertension                | -0.001   | -0.012 – 0.010  | 0.822            | -0.001   | -0.009 – 0.008  |
| MCI diagnosis X Time of scan                    | 0        | -0.004 – 0.004  | 0.930            | -0.001   | -0.004 – 0.002  |

|                                        |       |               |              |       |                |
|----------------------------------------|-------|---------------|--------------|-------|----------------|
| <b>AD diagnosis X<br/>Time of scan</b> | 0.007 | 0.001 – 0.012 | <b>0.015</b> | 0.001 | -0.003 – 0.005 |
|----------------------------------------|-------|---------------|--------------|-------|----------------|

in across networks.

|                  | FPN      |                |                  | SMN (hand) |                 |                  |
|------------------|----------|----------------|------------------|------------|-----------------|------------------|
| <i>p</i> value   | Estimate | CI             | <i>p</i> value   | Estimate   | CI              | <i>p</i> value   |
| <b>&lt;0.001</b> | 0.284    | 0.225 – 0.344  | <b>&lt;0.001</b> | 0.483      | 0.394 – 0.573   | <b>&lt;0.001</b> |
| 0.730            | 0.007    | -0.037 – 0.051 | 0.747            | -0.044     | -0.112 – 0.023  | 0.196            |
| 0.450            | -0.051   | -0.116 – 0.015 | 0.131            | -0.036     | -0.136 – 0.065  | 0.483            |
| 0.382            | -0.001   | -0.004 – 0.001 | 0.232            | -0.002     | -0.005 – 0.002  | 0.344            |
| 0.090            | 0.106    | 0.055 – 0.157  | <b>&lt;0.001</b> | 0.141      | 0.063 – 0.218   | <b>&lt;0.001</b> |
| <b>0.001</b>     | 0        | -0.001 – 0.000 | 0.165            | -0.001     | -0.002 – -0.000 | 0.006            |
| <b>0.002</b>     | 0.025    | 0.014 – 0.036  | <b>&lt;0.001</b> | 0.038      | 0.022 – 0.054   | <b>&lt;0.001</b> |
| 0.978            | -0.01    | -0.037 – 0.018 | 0.504            | -0.011     | -0.053 – 0.032  | 0.623            |
| 0.862            | -0.002   | -0.013 – 0.008 | 0.684            | -0.004     | -0.020 – 0.012  | 0.648            |
| 0.479            | -0.001   | -0.004 – 0.002 | 0.582            | 0.002      | -0.003 – 0.007  | 0.462            |

|       |       |                |       |   |                |       |
|-------|-------|----------------|-------|---|----------------|-------|
| 0.601 | 0.004 | -0.001 – 0.009 | 0.120 | 0 | -0.008 – 0.008 | 0.946 |
|-------|-------|----------------|-------|---|----------------|-------|

| SMN (mouth) |                 |                  | DAN      |                |                  |
|-------------|-----------------|------------------|----------|----------------|------------------|
| Estimate    | CI              | <i>p</i> value   | Estimate | CI             | <i>p</i> value   |
| 0.83        | 0.728 – 0.933   | <b>&lt;0.001</b> | 0.17     | 0.116 – 0.225  | <b>&lt;0.001</b> |
| -0.057      | -0.133 – 0.018  | 0.137            | 0.004    | -0.036 – 0.044 | 0.857            |
| -0.065      | -0.178 – 0.048  | 0.260            | -0.02    | -0.079 – 0.040 | 0.517            |
| -0.003      | -0.007 – 0.001  | 0.168            | -0.001   | -0.003 – 0.002 | 0.591            |
| -0.169      | -0.257 – -0.080 | <b>&lt;0.001</b> | 0.083    | 0.036 – 0.129  | <b>&lt;0.001</b> |
| -0.005      | -0.006 – -0.004 | <b>&lt;0.001</b> | 0        | -0.001 – 0.000 | 0.610            |
| 0.038       | 0.020 – 0.057   | <b>&lt;0.001</b> | 0.008    | -0.002 – 0.018 | 0.122            |
| -0.004      | -0.052 – 0.044  | 0.882            | -0.013   | -0.038 – 0.013 | 0.325            |
| -0.02       | -0.039 – -0.002 | <b>0.033</b>     | 0.012    | 0.002 – 0.022  | <b>0.014</b>     |
| 0.002       | -0.004 – 0.008  | 0.473            | -0.001   | -0.004 – 0.002 | 0.470            |

|       |                |       |       |                |      |
|-------|----------------|-------|-------|----------------|------|
| 0.002 | -0.006 – 0.011 | 0.589 | 0.001 | -0.003 – 0.006 | 0.54 |
|-------|----------------|-------|-------|----------------|------|
