# Supplementary material for: Behavioral and brain-wide neural signatures of sundowning in Alzheimer’s disease
Source: Research Square preprint supplement (doi:10.21203/rs.3.rs-9272255/v1), 2026-04-20
Supplement: Supplementary file 6 [file dc893c04173735ba0f366979.pdf]

Extended Data Table 3 | Saliency Network nodes and homologs in mice

| AAL3 region (Rolls et al., 2020)                                                                   | MNI coordinate (x, y, z) | Human region                                                            | Function                                                                                                                                                                                                                                                                                                                                                                           | Closest Allen Mouse Brain Atlas homolog (functional not anatomical) | BR  > 2 during PLSC analysis (Sundown) | Cluster 1 Region | References used for cross-species mapping                                                                                                                                                                                                                                                                                                                                                                                                                                                                                                                                                                                                                                                                                                                                                                                                                                                                                                                                                                                                               |
|----------------------------------------------------------------------------------------------------|--------------------------|-------------------------------------------------------------------------|------------------------------------------------------------------------------------------------------------------------------------------------------------------------------------------------------------------------------------------------------------------------------------------------------------------------------------------------------------------------------------|---------------------------------------------------------------------|----------------------------------------|------------------|---------------------------------------------------------------------------------------------------------------------------------------------------------------------------------------------------------------------------------------------------------------------------------------------------------------------------------------------------------------------------------------------------------------------------------------------------------------------------------------------------------------------------------------------------------------------------------------------------------------------------------------------------------------------------------------------------------------------------------------------------------------------------------------------------------------------------------------------------------------------------------------------------------------------------------------------------------------------------------------------------------------------------------------------------------|
| ACC_sup_L                                                                                          | (-0.2, 30.35, 27.22)     | Anterior cingulate cortex, supracallosal                                | <ol style="list-style-type: none"> <li>1. Emotional regulation</li> <li>2. Control of voluntary movement, particularly those requiring coordination and planning and/or action selection</li> <li>3. Goal-oriented reward evaluation</li> <li>4. Attentional switching between internal and external information</li> <li>5. Processing aversive or conflicting stimuli</li> </ol> | Prelimbic (PL)                                                      | Yes                                    | Yes              | <p>Tsai et al., 2020; PMID: 32981657; DOI: 10.1016/j.biopsych.2020.06.023</p> <p>Sforazzini et al., 2014; PMID: 26706448; DOI: 10.1016/j.neuroimage.2015.12.017</p> <p>Menon et al., 2023; PMID: 36797303; DOI: 10.1038/s41467-023-36616-8</p> <p>Mandino et al., 2022; PMID: 34650202; DOI: 10.1038/s41380-021-01298-5</p> <p>van Heukelum et al., 2020; PMID: 32353333; DOI: 10.1016/j.tins.2020.03.007</p> <p>van Hout et al., 2024; PMID: 38739155; DOI: 10.1007/s00429-024-02773-9</p> <p>Schaeffer et al., 2020; PMID: 32817555; DOI: 10.1073/pnas.2003181117</p> <p>Carlén, 2017; PMID: 29074767; DOI: 10.1126/science.aan8868</p> <p>Wang et al., 2020; PMID: 32386544; DOI: 10.1016/j.cell.2020.04.007</p> <p>Barthas &amp; Kwan, 2017; PMID: 28012708; DOI: 10.1016/j.tins.2016.11.006</p> <p>Van De Werd &amp; Uylings, 2014; PMID: 24072162; DOI: 10.1007/s00429-013-0630-7</p> <p>Laubach et al., 2018; PMID: 30406193; DOI: 10.1523/ENEURO.0315-18.2018</p> <p>van Hout et al., 2024; PMID: 38739155; DOI: 10.1007/s00429-024-02773-9</p> |
| ACC_sup_R                                                                                          | (10.26, 22.06, 27.48)    |                                                                         |                                                                                                                                                                                                                                                                                                                                                                                    |                                                                     |                                        |                  |                                                                                                                                                                                                                                                                                                                                                                                                                                                                                                                                                                                                                                                                                                                                                                                                                                                                                                                                                                                                                                                         |
| ACC (Area_anterior_32_prime_L in HCP atlas, Glasser et al., 2016; undefined in Rolls et al., 2020) | (-10.76, 25.99, 24.54)   | Anterior cingulate cortex                                               |                                                                                                                                                                                                                                                                                                                                                                                    |                                                                     |                                        |                  |                                                                                                                                                                                                                                                                                                                                                                                                                                                                                                                                                                                                                                                                                                                                                                                                                                                                                                                                                                                                                                                         |
| Cingulate_Mid_R                                                                                    | (10.51, -38.54, 50.02)   | Middle cingulate & paracingulate gyri                                   |                                                                                                                                                                                                                                                                                                                                                                                    |                                                                     |                                        |                  |                                                                                                                                                                                                                                                                                                                                                                                                                                                                                                                                                                                                                                                                                                                                                                                                                                                                                                                                                                                                                                                         |
| Cingulate_Mid_R                                                                                    | (5.23, 23.22, 37.03)     |                                                                         |                                                                                                                                                                                                                                                                                                                                                                                    |                                                                     |                                        |                  |                                                                                                                                                                                                                                                                                                                                                                                                                                                                                                                                                                                                                                                                                                                                                                                                                                                                                                                                                                                                                                                         |
| Frontal_Sup_2_L                                                                                    | (-27.5, 52.04, 21.28)    | Superior frontal gyrus, dorsolateral                                    | <ol style="list-style-type: none"> <li>1. Support flexible multitasking</li> <li>2. Working memory</li> <li>3. Prospective memory and planning</li> <li>4. Abstract rule representation</li> </ol>                                                                                                                                                                                 | Secondary motor area (MOs)                                          | Yes                                    | Yes              |                                                                                                                                                                                                                                                                                                                                                                                                                                                                                                                                                                                                                                                                                                                                                                                                                                                                                                                                                                                                                                                         |
| Frontal_Sup_2_R                                                                                    | (31.07, 55.71, 14.49)    | <i>*No direct homologs, this is considered a primate specialization</i> |                                                                                                                                                                                                                                                                                                                                                                                    |                                                                     |                                        |                  |                                                                                                                                                                                                                                                                                                                                                                                                                                                                                                                                                                                                                                                                                                                                                                                                                                                                                                                                                                                                                                                         |
| Frontal_Mid_2_L                                                                                    | (-39.12, 50.79, 17.38)   | Middle frontal gyrus                                                    |                                                                                                                                                                                                                                                                                                                                                                                    | *No direct homologs, this is considered a primate specialization    |                                        |                  |                                                                                                                                                                                                                                                                                                                                                                                                                                                                                                                                                                                                                                                                                                                                                                                                                                                                                                                                                                                                                                                         |
| Frontal_Mid_2_R                                                                                    | (26.07, 49.56, 26.58)    |                                                                         |                                                                                                                                                                                                                                                                                                                                                                                    |                                                                     |                                        |                  |                                                                                                                                                                                                                                                                                                                                                                                                                                                                                                                                                                                                                                                                                                                                                                                                                                                                                                                                                                                                                                                         |
| Frontal_Mid_2_R                                                                                    | (31.24, 32.79, 26.39)    |                                                                         |                                                                                                                                                                                                                                                                                                                                                                                    |                                                                     |                                        |                  |                                                                                                                                                                                                                                                                                                                                                                                                                                                                                                                                                                                                                                                                                                                                                                                                                                                                                                                                                                                                                                                         |
| Frontal_Inf_Orb_2_R                                                                                | (36.89, 32.35, -2.24)    | The orbital part of inferior frontal gyrus                              | <ol style="list-style-type: none"> <li>1. Semantic processing</li> <li>2. Conflict monitoring and impulse inhibition</li> <li>3. Social cognition</li> <li>4. Reversal learning</li> </ol>                                                                                                                                                                                         | Orbital area (ORB)                                                  | Not analyzed                           | No               |                                                                                                                                                                                                                                                                                                                                                                                                                                                                                                                                                                                                                                                                                                                                                                                                                                                                                                                                                                                                                                                         |
| Frontal_Inf_Tri_R                                                                                  | (47.6, 22.16, 9.74)      | Inferior frontal gyrus, triangular part                                 |                                                                                                                                                                                                                                                                                                                                                                                    |                                                                     |                                        |                  |                                                                                                                                                                                                                                                                                                                                                                                                                                                                                                                                                                                                                                                                                                                                                                                                                                                                                                                                                                                                                                                         |
| Insula_L                                                                                           | (-35.44, 20.03, 0.07)    | Insula                                                                  | <ol style="list-style-type: none"> <li>1. Integrating sensory information with emotions to create subjective affective states</li> <li>2. Integrating internal and external stimuli to guide behavior</li> </ol>                                                                                                                                                                   | Agranular insula area (AI)                                          | Trending (-1.77)                       | No               |                                                                                                                                                                                                                                                                                                                                                                                                                                                                                                                                                                                                                                                                                                                                                                                                                                                                                                                                                                                                                                                         |
| Insula_R                                                                                           | (35.91, 21.91, 2.62)     |                                                                         |                                                                                                                                                                                                                                                                                                                                                                                    |                                                                     |                                        |                  |                                                                                                                                                                                                                                                                                                                                                                                                                                                                                                                                                                                                                                                                                                                                                                                                                                                                                                                                                                                                                                                         |
| Insula_R                                                                                           | (33.56, 16.45, -7.58)    |                                                                         |                                                                                                                                                                                                                                                                                                                                                                                    |                                                                     |                                        |                  |                                                                                                                                                                                                                                                                                                                                                                                                                                                                                                                                                                                                                                                                                                                                                                                                                                                                                                                                                                                                                                                         |
| SupraMarginal_R                                                                                    | (55.27, -44.59, 36.7)    | Supramarginal gyrus (part of inferior parietal lobe)                    | <ol style="list-style-type: none"> <li>1. Language processing</li> <li>2. Auditory perception</li> <li>3. Spatial awareness</li> <li>4. Multisensory integration</li> </ol>                                                                                                                                                                                                        | Posterior parietal association areas (PTLp)                         | No                                     | Yes              |                                                                                                                                                                                                                                                                                                                                                                                                                                                                                                                                                                                                                                                                                                                                                                                                                                                                                                                                                                                                                                                         |
|                                                                                                    |                          | *No direct homologs, this is considered a primate specialization        |                                                                                                                                                                                                                                                                                                                                                                                    | Restrosplenial Area (RSP; has been categorized as both DMN and SN)  | Yes                                    | Yes              |                                                                                                                                                                                                                                                                                                                                                                                                                                                                                                                                                                                                                                                                                                                                                                                                                                                                                                                                                                                                                                                         |
|                                                                                                    |                          |                                                                         |                                                                                                                                                                                                                                                                                                                                                                                    | Secondary somatosensory cortex (SSs)                                | Yes                                    | Yes              |                                                                                                                                                                                                                                                                                                                                                                                                                                                                                                                                                                                                                                                                                                                                                                                                                                                                                                                                                                                                                                                         |
| Precentral_R                                                                                       | (42.05, -0.39, 47.1)     | Precentral gyrus                                                        | 1. Motor initiation                                                                                                                                                                                                                                                                                                                                                                | Primary motor area (MOp)                                            | Yes                                    | Yes              |                                                                                                                                                                                                                                                                                                                                                                                                                                                                                                                                                                                                                                                                                                                                                                                                                                                                                                                                                                                                                                                         |
| Supp_Motor_Area_L                                                                                  | (-0.94, 14.86, 43.99)    | Supplementary motor area                                                | 1. Motor planning & sequencing                                                                                                                                                                                                                                                                                                                                                     | Secondary motor area (MOs)                                          | Yes                                    | Yes              |                                                                                                                                                                                                                                                                                                                                                                                                                                                                                                                                                                                                                                                                                                                                                                                                                                                                                                                                                                                                                                                         |
