# Supplementary material for: Behavioral and brain-wide neural signatures of sundowning in Alzheimer’s disease
Source: Research Square preprint supplement (doi:10.21203/rs.3.rs-9272255/v1), 2026-04-20
Supplement: Supplementary file 7 [file f9bf3e696abf883c753f34c4.pdf]

Supplementary Table 4 | Key Resources Table

| Reagent type (species) or resource      | Designation                                | Source or reference                                                                                                               | Identifiers                               | Additional information                              |
|-----------------------------------------|--------------------------------------------|-----------------------------------------------------------------------------------------------------------------------------------|-------------------------------------------|-----------------------------------------------------|
| strain, strain background (mouse, male) | 129S6/SvEv                                 | Taconic                                                                                                                           | 129S6/SvEvTac                             |                                                     |
| genetic reagent (mouse)                 | ArcCreERT2(+) x eYFP                       | Denny et al., 2014;                                                                                                               | RRID: IMSR_JAX:039977 (Stock no. 039977); | Bred in-house on 129S6/SvEv background              |
|                                         |                                            | Srinivas et al., 2001                                                                                                             | RRID:                                     |                                                     |
|                                         |                                            |                                                                                                                                   | IMSR_JAX:006148 (Stock no. 006148)        |                                                     |
| antibody                                | anti-GFP (chicken polyclonal)              | Abcam, Cambridge, MA                                                                                                              | Catalog No: ab13970                       | IF (1:2000)                                         |
| antibody                                | Cy2 (conjugated donkey anti-chicken IgG)   | Jackson ImmunoResearch, West Grove, PA                                                                                            | Catalog No: 703-225-155, RRID: AB_2340370 | IF (1:250)                                          |
| antibody                                | IgG anti-c-Fos (Rat monoclonal)            | SySy, Goettingen, Germany                                                                                                         | Catalog No: 226 017                       | IF (1:5000)                                         |
| antibody                                | Alexa 647 (conjugated donkey anti-rat IgG) | Life Technologies, Carlsbad, CA                                                                                                   | Catalog No: A-31573, RRID: AB_2536183     | IF (1:500)                                          |
| antibody                                | anti-VIP (Rabbit polyclonal)               | Immunostar                                                                                                                        | Catalog No: 20077; RRID: AB_572270        | IF (1:10000)                                        |
| antibody                                | Alexa 488 (donkey anti-rabbit IgG)         | Invitrogen, Waltham, MA                                                                                                           | Cat.# A21206; RRID: AB_2535792            | IF (1:500)                                          |
| antibody                                | anti-AVP (mouse monoclonal)                | Santa Cruz Biotechnology                                                                                                          | Catalog No: sc-390723                     | IF (1:200)                                          |
| antibody                                | Cy3 (donkey anti-mouse whole IgG)          | Jackson ImmunoResearch                                                                                                            | Catalog No: 715-165-150; RRID: AB_2340813 | IF (1:500)                                          |
| chemical compound, drug                 | 4-hydroxytamoxifen (4-OHT)                 | Sigma-Aldrich, St. Louis, MO                                                                                                      | Catalog No: H6278                         |                                                     |
| other                                   | Fluoromount-G Mounting Medium              | Electron Microscopy Sciences, Hatfield, PA                                                                                        | Cat.#17984-25                             | See Immunohistochemistry section                    |
| software, algorithm                     | ImageJ                                     | <a href="http://fiji.sc/">http://fiji.sc/</a>                                                                                     |                                           | (v.1.52p)                                           |
| software, algorithm                     | R                                          | <a href="https://www.r-project.org/">https://www.r-project.org/</a>                                                               |                                           | (v 3.6.3)                                           |
| software, algorithm                     | RStudio                                    | <a href="https://posit.co/download/rstudio-desktop/">https://posit.co/download/rstudio-desktop/</a>                               |                                           | (2022.07.2)                                         |
| software, algorithm                     | SMARTTR                                    | <a href="https://github.com/mjin1812/SMARTTR">https://github.com/mjin1812/SMARTTR</a>                                             |                                           | Maintainer: Michelle Jin (mj2947@cumc.columbia.edu) |
| software, algorithm                     | fMRIprep                                   | <a href="https://fmriprep.org/en/stable/">https://fmriprep.org/en/stable/</a>                                                     | RRID: SCR_016216                          | v 20.2.3                                            |
| software, algorithm                     | mcflirt                                    | <a href="https://web.mit.edu/fsl_v5.0.10/fsl/doc/wiki/MCFLIRT.html">https://web.mit.edu/fsl_v5.0.10/fsl/doc/wiki/MCFLIRT.html</a> |                                           | FSL 5.0.9                                           |
| software, algorithm                     | AFNI 20160207                              | <a href="https://afni.nimh.nih.gov/">https://afni.nimh.nih.gov/</a>                                                               | RRID: SCR_005927                          | 20160207                                            |
| software, algorithm                     | bbregister                                 | <a href="https://surfer.nmr.mgh.harvard.edu/fswiki/bbregister">https://surfer.nmr.mgh.harvard.edu/fswiki/bbregister</a>           |                                           |                                                     |
